# Supplementary material for: The Effectiveness of Psychological Interventions for Rheumatoid Arthritis (RA): A Systematic Review and Meta-Analysis
Source: MDPI journal article supplement (doi:10.3390/life13030849), 2023-03-21
Supplement: s1 [file s1]

**Table S1. List of rejected articles**

| No. | File name       | Final decision | In-text citation            | Reason of rejection                                            |
|-----|-----------------|----------------|-----------------------------|----------------------------------------------------------------|
| 396 | A'yun_2019      | No             | A'yun & Hartini, 2019       | Study design was not randomized controlled trial.              |
| 1   | Abeson_2020     | No             | Abeson, 2020                | Full text not available.                                       |
| 2   | Abou_Raya_2014  | No             | Abou-Raya & Abou-Raya, 2014 | Full text not available.                                       |
| 397 | Abourazzak_2009 | No             | Abourazzak et al., 2009     | Study design was not randomized controlled trial.              |
| 3   | Ackerman_2016   | No             | Ackerman et al., 2016       | Study design was not randomized controlled trial.              |
| 398 | Akhlagi_2018    | No             | Akhlaghi et al., 2018       | Necessary statistical data for meta-analysis was not provided. |
| 4   | Albano_2010     | No             | Albano et al., 2010         | Study design was not randomized controlled trial.              |
| 6   | Anderson_1985   | No             | Anderson et al., 1985       | Study design was not randomized controlled trial.              |
| 5   | Anderson_2004   | No             | Anderson et al., 2004       | Study design was not randomized controlled trial.              |
| 8   | APHA_1962       | No             | APHA, 1962                  | Study design was not randomized controlled trial.              |
| 9   | APHA_1964       | No             | APHA, 1964                  | Study design was not randomized controlled trial.              |
| 10  | APHA_1965       | No             | APHA, 1965                  | Study design was not randomized controlled trial.              |
| 11  | APHA_1966       | No             | APHA, 1966                  | Study design was not randomized controlled trial.              |
| 12  | APHA_1968       | No             | APHA, 1968                  | Study design was not randomized controlled trial.              |
| 13  | APHA_1969       | No             | APHA, 1969                  | Study design was not randomized controlled trial.              |

|     |                                                                                                                                        |    |                             |                                                                |
|-----|----------------------------------------------------------------------------------------------------------------------------------------|----|-----------------------------|----------------------------------------------------------------|
| 15  | Armour, G. (1950).<br>Rheumatoid arthritis;<br>physiotherapy and<br>psychotherapy in spa<br>treatment. Br J Phys Med,<br>13(1), 19-21. | No | Armour, 1950                | Full text not available.                                       |
| 17  | Astin_2002                                                                                                                             | No | Astin et al., 2002          | Study design was not randomized controlled trial.              |
| 18  | Bachmair_2021                                                                                                                          | No | Bachmair et al., 2021       | Study population included non-RA patients.                     |
| 19  | Badgley_1971                                                                                                                           | No | Badgley et al., 1971        | Study design was not randomized controlled trial.              |
| 20  | Bagheri_Nesami_2006                                                                                                                    | No | Bagheri-Nesami et al., 2006 | Study design was not randomized controlled trial.              |
| 21  | Banerjee_2017                                                                                                                          | No | Banerjee et al., 2018       | Study design was not randomized controlled trial.              |
| 399 | Baratzadeh_2021                                                                                                                        | No | Baratzadeh et al., 2021     | Written language was other than English.                       |
| 23  | Barlow_1997                                                                                                                            | No | Barlow et al., 1997         | Intervention was not psychological therapy.                    |
| 24  | Barlow_1998a                                                                                                                           | No | Barlow et al., 1998         | Study population included non-RA patients.                     |
| 25  | Barlow_1998b                                                                                                                           | No | Barlow et al., 1998         | Study population included non-RA patients.                     |
| 26  | Barlow_2000                                                                                                                            | No | Barlow et al., 2000         | Study population included non-RA patients.                     |
| 22  | Barlow_2009                                                                                                                            | No | Barlow et al., 2009         | Study population included non-RA patients.                     |
| 29  | Basler_1991                                                                                                                            | No | Basler, 1991                | Written language was other than English.                       |
| 28  | Basler_1993                                                                                                                            | No | Basler, 1993                | Necessary statistical data for meta-analysis was not provided. |
| 30  | Bawa_2015                                                                                                                              | No | Bawa et al., 2015           | Study design was not randomized controlled trial.              |
| 32  | Bearne_2012                                                                                                                            | No | Bearne et al., 2012         | Full text not available.                                       |
| 31  | Bearne_2015                                                                                                                            | No | Bearne et al., 2015         | Full text not available.                                       |
| 33  | Beaulieu_2020a                                                                                                                         | No | Beaulieu et al., 2020       | Full text not available.                                       |
| 34  | Berg_1985                                                                                                                              | No | Berg et al., 1985           | Necessary statistical data for meta-analysis was not provided. |
| 372 | Berman_2009                                                                                                                            | No | Berman et al., 2009         | Study population included non-RA patients.                     |

|     |                                                                                                                           |    |                             |                                                                |
|-----|---------------------------------------------------------------------------------------------------------------------------|----|-----------------------------|----------------------------------------------------------------|
| 36  | Bhattarai_2019                                                                                                            | No | Bhattarai et al., 2019      | Study population included non-RA patients.                     |
| 37  | Birch_2020                                                                                                                | No | Birch et al., 2020          | Study design was not randomized controlled trial.              |
| 38  | Blaney_2021                                                                                                               | No | Blaney et al., 2021         | Study design was not randomized controlled trial.              |
| 39  | Bode_2008                                                                                                                 | No | Bode et al., 2008           | Study design was not randomized controlled trial.              |
| 40  | Bos_2013                                                                                                                  | No | Bos et al., 2013            | Study population included non-RA patients.                     |
| 41  | Brach_2010                                                                                                                | No | Brach et al., 2010          | Study design was not randomized controlled trial.              |
| 44  | Bradley_1985                                                                                                              | No | Bradley et al., 1985,       | Full text not available.                                       |
| 43  | Bradley_1999                                                                                                              | No | Bradley & Alberts, 1999     | Study design was not randomized controlled trial.              |
| 42  | Bradley, L. A. (1989).<br>Cognitive-behavioral<br>therapy for primary<br>fibromyalgia. J Rheumatol<br>Suppl, 19, 131-136. | No | Bradley, 1989               | Intervention was not psychological therapy.                    |
| 400 | Branch_1999                                                                                                               | No | Branch et al., 1999         | Study population included non-RA patients.                     |
| 47  | Broderick_2004                                                                                                            | No | Broderick et al., 2004      | Necessary statistical data for meta-analysis was not provided. |
| 48  | Bruce_1988                                                                                                                | No | Bruce et al., 1988          | Necessary statistical data for meta-analysis was not provided. |
| 49  | Brus_1997a                                                                                                                | No | Brus et al., 1997           | Study design was not randomized controlled trial.              |
| 51  | Brycz_1988                                                                                                                | No | Brycz, 1988                 | Written language was other than English.                       |
| 52  | Buckelew_1989                                                                                                             | No | Buckelew & Parker, 1989     | Study design was not randomized controlled trial.              |
| 53  | Buckley_1990                                                                                                              | No | Buckley et al., 1990        | Study design was not randomized controlled trial.              |
| 54  | Buszewicz_2006                                                                                                            | No | Buszewicz et al., 2006      | Study population included non-RA patients.                     |
| 55  | Cárdenas-Cloud_2021                                                                                                       | No | Cárdenas-Cloud et al., 2021 | Study design was not randomized controlled trial.              |

|     |                      |    |                                                   |                                                                |
|-----|----------------------|----|---------------------------------------------------|----------------------------------------------------------------|
| 56  | Carlson_2012         | No | Carlson, 2012                                     | Study design was not randomized controlled trial.              |
| 57  | Carroll_1998         | No | Carroll & Seers, 1998                             | Study design was not randomized controlled trial.              |
| 58  | Carson_2006          | No | Carson et al., 2006                               | Necessary statistical data for meta-analysis was not provided. |
| 59  | CDC_2009             | No | Center for Disease Control & Prevention CDC, 2009 | Study design was not randomized controlled trial.              |
| 60  | CDC_2011             | No | Center for Disease Control & Prevention CDC, 2011 | Study design was not randomized controlled trial.              |
| 61  | Cepeda_2006          | No | Cepeda et al., 2006                               | Study design was not randomized controlled trial.              |
| 62  | Chadi_2019           | No | Chadi et al., 2019                                | Study population included non-RA patients.                     |
| 63  | Chambers_2000        | No | Chambers & Schauenstein, 2000                     | Study design was not randomized controlled trial.              |
| 64  | Chen_2021            | No | Chen et al., 2021                                 | Study population included non-RA patients.                     |
| 401 | Choi_2022            | No | Choi et al., 2022                                 | Study population included non-RA patients.                     |
| 65  | Chomistek_2020       | No | Chomistek et al., 2020,                           | Study population included non-RA patients.                     |
| 66  | Chomsitek_2022       | No | Chomistek et al., 2022                            | Study population included non-RA patients.                     |
| 67  | Chui_2004            | No | Chui et al., 2004                                 | Study design was not randomized controlled trial.              |
| 68  | Cioppa_1975          | No | Cioppa & Thal, 1975                               | Study design was not randomized controlled trial.              |
| 69  | Clarke_1997          | No | Clarke, 1997                                      | Study design was not randomized controlled trial.              |
| 70  | Clerget-Darpoux_2007 | No | Clerget-Darpoux & Elston, 2007                    | Study design was not randomized controlled trial.              |
| 402 | Connelly_2007        | No | Connelly et al., 2007                             | Intervention was not psychological therapy.                    |
| 72  | Connelly_2019        | No | Connelly et al., 2019                             | Study population included non-RA patients.                     |
| 73  | Conner_2006          | No | Conner et al., 2006                               | Intervention was not psychological therapy.                    |

|    |                                                                                                                                                                                                                                                                                                                                                                                                                                         |    |                       |                                                   |
|----|-----------------------------------------------------------------------------------------------------------------------------------------------------------------------------------------------------------------------------------------------------------------------------------------------------------------------------------------------------------------------------------------------------------------------------------------|----|-----------------------|---------------------------------------------------|
| 74 | Cook_2020                                                                                                                                                                                                                                                                                                                                                                                                                               | No | Cook et al., 2020     | Full text not available.                          |
| 75 | Costa_2019                                                                                                                                                                                                                                                                                                                                                                                                                              | No | Costa et al., 2019    | Study design was not randomized controlled trial. |
| 78 | Cramp_2013                                                                                                                                                                                                                                                                                                                                                                                                                              | No | Cramp et al., 2013    | Study design was not randomized controlled trial. |
| 76 | Cramp_2019                                                                                                                                                                                                                                                                                                                                                                                                                              | No | Cramp, 2019           | Study design was not randomized controlled trial. |
| 77 | Cramp, F., Hewlett, S., Almeida, C., Kirwan, J., Choy, E., Chalder, T., Pollock, J., & Christensen, R. (2011). Systematic review and meta-analyses of non-pharmacological interventions for fatigue in rheumatoid arthritis. Rheumatology, 50, iii99-iii100.<br><a href="https://www.cochranelibrary.com/central/doi/10.1002/central/CN-01003720/full">https://www.cochranelibrary.com/central/doi/10.1002/central/CN-01003720/full</a> | No | Cramp et al., 2011,   | Full text not available.                          |
| 79 | Criswell, L. A., & Katz, P. (1994). Relationship of education level to treatment received for rheumatoid arthritis. J Rheumatol, 21(11), 2026-2033.                                                                                                                                                                                                                                                                                     | No | Criswell & Katz, 1994 | Full text not available.                          |
| 80 | Ctri. (2019). Effect of mindfulness on Psychological well-being and functioning in Rheumatoid Arthritis.                                                                                                                                                                                                                                                                                                                                | No | Ctri, 2019            | Unpublished clinical trial.                       |

<https://trialsearch.who.int/Trial2.aspx?TrialID=CTRI/2019/12/022461>.

<https://www.cochranelibrary.com/central/doi/10.1002/central/CN-02067144/full>

|     |                 |    |                                 |                                                                |
|-----|-----------------|----|---------------------------------|----------------------------------------------------------------|
| 81  | Cliss_2010      | No | Cliss et al., 2010              | Full text not available.                                       |
| 82  | Dager_2012      | No | Dager et al., 2012              | Study design was not randomized controlled trial.              |
| 373 | DanoffBurg_2006 | No | Danoff-Burg et al., 2006        | Study population included non-RA patients.                     |
| 84  | Davis_1990      | No | Davis et al., 1990              | Study design was not randomized controlled trial.              |
| 87  | Davis_1994      | No | Davis et al., 1994              | Study design was not randomized controlled trial.              |
| 85  | Davis_2006      | No | Davis et al., 2006,             | Intervention was not psychological therapy.                    |
| 445 | Davis_2008      | No | Davis & White, 2008             | Study design was not randomized controlled trial.              |
| 88  | DeBrouwer_2011a | No | De Brouwer et al., 2011         | Full text not available.                                       |
| 89  | DeBrouwer_2013  | No | De Brouwer et al., 2013         | Other                                                          |
| 374 | deBuck_2005     | No | De Buck et al., 2005            | Intervention was not psychological therapy.                    |
| 91  | DeFreitas_2018  | No | De Freitas, 2018                | Study design was not randomized controlled trial.              |
| 92  | DelRosso_2016   | No | Del Rosso & Maddali-Bongi, 2016 | Study design was not randomized controlled trial.              |
| 403 | Deng_2013       | No | Deng & Hu, 2013                 | Study design was not randomized controlled trial.              |
| 375 | DeVellis_1988   | No | Devellis et al., 1988           | Necessary statistical data for meta-analysis was not provided. |
| 93  | DeVellis_1993   | No | DeVellis & Blalock, 1993        | Study design was not randomized controlled trial.              |

|     |                                                                                                                                                                                                                                                                                                                                                                                                                                                                                                                 |    |                              |                                                   |
|-----|-----------------------------------------------------------------------------------------------------------------------------------------------------------------------------------------------------------------------------------------------------------------------------------------------------------------------------------------------------------------------------------------------------------------------------------------------------------------------------------------------------------------|----|------------------------------|---------------------------------------------------|
| 94  | Dhokia_2020                                                                                                                                                                                                                                                                                                                                                                                                                                                                                                     | No | Dhokia et al., 2020          | Study population included non-RA patients.        |
| 95  | DiRenzo_2018                                                                                                                                                                                                                                                                                                                                                                                                                                                                                                    | No | DiRenzo & Finan, 2019        | Study design was not randomized controlled trial. |
| 96  | DiRenzo_2019                                                                                                                                                                                                                                                                                                                                                                                                                                                                                                    | No | DiRenzo et al., 2018         | Study design was not randomized controlled trial. |
| 97  | Dissanayake_2010                                                                                                                                                                                                                                                                                                                                                                                                                                                                                                | No | Dissanayake & Bertouch, 2010 | Study design was not randomized controlled trial. |
| 98  | Dixon_2007                                                                                                                                                                                                                                                                                                                                                                                                                                                                                                      | No | Dixon et al., 2007           | Study design was not randomized controlled trial. |
| 99  | Dixon-Woods_2007                                                                                                                                                                                                                                                                                                                                                                                                                                                                                                | No | Dixon-Woods et al., 2007     | Study design was not randomized controlled trial. |
| 100 | Donovan_1991                                                                                                                                                                                                                                                                                                                                                                                                                                                                                                    | No | Donovan, 1991                | Study design was not randomized controlled trial. |
| 101 | Dowsey_2019                                                                                                                                                                                                                                                                                                                                                                                                                                                                                                     | No | Dowsey et al., 2019          | Study population included non-RA patients.        |
| 102 | Dramsdahl_2019                                                                                                                                                                                                                                                                                                                                                                                                                                                                                                  | No | Dramsdahl et al., 2019       | Study population included non-RA patients.        |
| 103 | Drks. (2019). Effectiveness and cost-effectiveness of guided internet-and mobile-based CBT for adolescents and young adults with chronic somatic conditions and comorbid depression and anxiety symptoms (youthCOACHcd): a multicentre randomized controlled trial with a 12-month follow-up.<br><a href="https://trialsearch.who.int/Trial2.aspx?TrialID=DRKS00017161">https://trialsearch.who.int/Trial2.aspx?TrialID=DRKS00017161</a> .<br><a href="https://www.cochranelibra">https://www.cochranelibra</a> | No | Drks, 2019                   | Unpublished clinical trial.                       |

|     |                                                                                                                                                                                                                                                                                                                                                          |    |                                     |                                                   |
|-----|----------------------------------------------------------------------------------------------------------------------------------------------------------------------------------------------------------------------------------------------------------------------------------------------------------------------------------------------------------|----|-------------------------------------|---------------------------------------------------|
|     | ry.com/central/doi/10.1002/central/CN-02067289/full                                                                                                                                                                                                                                                                                                      |    |                                     |                                                   |
| 104 | Drotar_2005                                                                                                                                                                                                                                                                                                                                              | No | Drotar, 2005                        | Study design was not randomized controlled trial. |
| 105 | Duda_2010                                                                                                                                                                                                                                                                                                                                                | No | Duda & Veldhuijzen van Zanten, 2010 | Study design was not randomized controlled trial. |
| 106 | Dunne_2021                                                                                                                                                                                                                                                                                                                                               | No | Dunne & Schubert, 2021              | Study design was not randomized controlled trial. |
| 109 | Dures_2012                                                                                                                                                                                                                                                                                                                                               | No | Dures et al., 2011,                 | Study design was not randomized controlled trial. |
| 107 | Dures_2014                                                                                                                                                                                                                                                                                                                                               | No | Dures et al., 2012,                 | Study design was not randomized controlled trial. |
| 108 | Dures, E., Kitchen, K., Almeida, C., Ambler, N., Cliss, A., Hammond, A., & Knops, B. (2011). It's totally turned around the way I think: the patient perspective of cognitive behavioural therapy for fatigue in rheumatoid arthritis. Arthritis and rheumatism, 63(10).<br>https://www.cochranelibrary.com/central/doi/10.1002/central/CN-01005141/full | No | Dures et al., 2014                  | Full text not available.                          |
| 110 | Esbensen_2015                                                                                                                                                                                                                                                                                                                                            | No | Esbensen, 2015                      | Study design was not randomized controlled trial. |
| 112 | Evers_1997                                                                                                                                                                                                                                                                                                                                               | No | Evers et al., 1997,                 | Study design was not randomized controlled trial. |
| 113 | Evers_2001                                                                                                                                                                                                                                                                                                                                               | No | Evers et al., 2001                  | Study design was not randomized controlled trial. |
| 404 | Evers_2003                                                                                                                                                                                                                                                                                                                                               | No | Evers et al., 2003                  | Intervention was not psychological therapy.       |



|     |                                                                                                                                                                                                                                    |    |                               |                                                                |
|-----|------------------------------------------------------------------------------------------------------------------------------------------------------------------------------------------------------------------------------------|----|-------------------------------|----------------------------------------------------------------|
| 114 | Farah_2019                                                                                                                                                                                                                         | No | Farah et al., 2019            | Study design was not randomized controlled trial.              |
| 115 | Felsted_2020                                                                                                                                                                                                                       | No | Felsted, 2020                 | Study design was not randomized controlled trial.              |
| 116 | Fenton_2020                                                                                                                                                                                                                        | No | Fenton et al., 2018           | Full text not available.                                       |
| 119 | Ferwerda_2016                                                                                                                                                                                                                      | No | Ferwerda et al., 2016,        | Study population included non-RA patients.                     |
| 118 | Ferwerda_2018                                                                                                                                                                                                                      | No | Ferwerda et al., 2018         | Other                                                          |
| 120 | Fiest_2017                                                                                                                                                                                                                         | No | Fiest et al., 2017            | Study design was not randomized controlled trial.              |
| 377 | Flor_1983                                                                                                                                                                                                                          | No | Flor et al., 1983             | Study population included non-RA patients.                     |
| 121 | Fogarty_2015                                                                                                                                                                                                                       | No | Fogarty et al., 2015,         | Full text not available.                                       |
| 123 | Ford_2019                                                                                                                                                                                                                          | No | Ford & Long, 1977             | Study design was not randomized controlled trial.              |
| 124 | Freeman_2002                                                                                                                                                                                                                       | No | Freeman et al., 2002          | Necessary statistical data for meta-analysis was not provided. |
| 405 | Garnefski_2013                                                                                                                                                                                                                     | No | Garnefski et al., 2013        | Study population included non-RA patients.                     |
| 125 | Garza-Villareal_2014                                                                                                                                                                                                               | No | Garza-Villarreal et al., 2014 | Intervention was not psychological therapy.                    |
| 378 | Gay_2002                                                                                                                                                                                                                           | No | Gay et al., 2002              | Study population included non-RA patients.                     |
| 126 | Geirhos_2022                                                                                                                                                                                                                       | No | Geirhos et al., 2022          | Study population included non-RA patients.                     |
| 127 | Geissner, E., Jungnitsch, G., & Schmitz, J. (1994). [Psychological treatment approaches in pain. A comparative study of therapies in patients with chronic polyarthritis]. Z Klin Psychol Psychopathol Psychother, 42(4), 319-338. | No | Geissner et al., 1994         | Written language was other than English.                       |
| 128 | Gerber_1987                                                                                                                                                                                                                        | No | Gerber et al., 1987           | Full text not available.                                       |
| 129 | Gerlich_2020                                                                                                                                                                                                                       | No | Gerlich et al., 2020          | Written language was other than English.                       |
| 130 | Germond_1993                                                                                                                                                                                                                       | No | Germond et al., 1993          | Necessary statistical data for meta-analysis was not provided. |

|     |                 |    |                               |                                                                |
|-----|-----------------|----|-------------------------------|----------------------------------------------------------------|
| 131 | Giacobbi_2015   | No | Giacobbi et al., 2015         | Study design was not randomized controlled trial.              |
| 132 | Gillis_2006     | No | Gillis et al., 2006           | Study population included non-RA patients.                     |
| 406 | Goeppinger_1989 | No | Goeppinger et al., 1989       | Study population included non-RA patients.                     |
| 135 | Gronning_2012   | No | Grønning et al., 2012,        | Study population included non-RA patients.                     |
| 134 | Gronning_2014   | No | Grønning et al., 2014         | Study population included non-RA patients.                     |
| 136 | Guétin_2012     | No | Guétin et al., 2012           | Study population included non-RA patients.                     |
| 137 | Hammond_1998    | No | Hammond, 1998,                | Study design was not randomized controlled trial.              |
| 408 | Hammond_1999    | No | Hammond et al., 1999          | Necessary statistical data for meta-analysis was not provided. |
| 140 | Hammond_2001    | No | Hammond & Freeman, 2001,      | Other                                                          |
| 138 | Hammond_2004    | No | Hammond, 2004                 | Study design was not randomized controlled trial.              |
| 409 | Hammond_2005    | No | Hammond & Klompenhouwer, 2005 | Study design was not randomized controlled trial.              |
| 139 | Hammond_2008    | No | Hammond et al., 2008          | Study population included non-RA patients.                     |
| 142 | Harrold_2018    | No | Harrold et al., 2018          | Intervention was not psychological therapy.                    |
| 143 | Hawley_1995     | No | Hawley, 1995                  | Study design was not randomized controlled trial.              |
| 144 | Hawtin_2011     | No | Hawtin & Sullivan, 2011       | Study design was not randomized controlled trial.              |
| 145 | Haydu_1963      | No | Haydu, 1963                   | Study design was not randomized controlled trial.              |
| 146 | Heiberg_2002    | No | Heiberg & Kvien, 2002         | Study design was not randomized controlled trial.              |
| 379 | Helewa_1991     | No | Helewa et al., 1991           | Intervention was not psychological therapy.                    |
| 147 | Helliwell_1999  | No | Helliwell et al., 1999        | Necessary statistical data for meta-analysis was not provided. |
| 410 | Helmes_2015     | No | Helmes et al., 2015           | Study population included non-RA patients.                     |

|     |                                                                                                                                                                                                                                                                                                                            |    |                                |                                                                |
|-----|----------------------------------------------------------------------------------------------------------------------------------------------------------------------------------------------------------------------------------------------------------------------------------------------------------------------------|----|--------------------------------|----------------------------------------------------------------|
| 148 | Herschbach_2010                                                                                                                                                                                                                                                                                                            | No | Herschbach et al., 2010        | Study population included non-RA patients.                     |
| 153 | Hewlett_2010                                                                                                                                                                                                                                                                                                               | No | Hewlett et al., 2010,          | Full text not available.                                       |
| 151 | Hewlett_2015                                                                                                                                                                                                                                                                                                               | No | Hewlett et al., 2015,          | Study design was not randomized controlled trial.              |
| 149 | Hewlett_2019                                                                                                                                                                                                                                                                                                               | No | Hewlett et al., 2019           | Other                                                          |
| 154 | Hewlett, S. E., Ambler, N., Knops, B., Cliss, A., Almeida, C., Pope, D., & Hammond, A. (2010). Sustained reduction in fatigue impact in rheumatoid arthritis: RCT of cognitive behavioural therapy. Arthritis and rheumatism, 62, 1325-. <a href="https://doi.org/10.1002/art.29091">https://doi.org/10.1002/art.29091</a> | No | Hewlett et al., 2010           | Full text not available.                                       |
| 155 | Hill_1997                                                                                                                                                                                                                                                                                                                  | No | Hill et al., 2001              | Study design was not randomized controlled trial.              |
| 156 | Hill_2001                                                                                                                                                                                                                                                                                                                  | No | Hill, 1997                     | Necessary statistical data for meta-analysis was not provided. |
| 158 | Horton-hausknecht_2000                                                                                                                                                                                                                                                                                                     | No | Horton & Mitzdorf, 1994        | Study design was not randomized controlled trial.              |
| 157 | Horton, J. R., & Mitzdorf, U. (1994). Clinical hypnosis in the treatment of rheumatoid arthritis. Psychologische Beitrage, 36(1-2), 205-212.                                                                                                                                                                               | No | Horton-hausknecht et al., 2000 | Written language was other than English.                       |
| 159 | Hoving_2014                                                                                                                                                                                                                                                                                                                | No | Hoving et al., 2014            | Study design was not randomized controlled trial.              |

|     |                                                                                                                                                                                                                                                                                                                                                                                                                                                                                                                                 |    |                             |
|-----|---------------------------------------------------------------------------------------------------------------------------------------------------------------------------------------------------------------------------------------------------------------------------------------------------------------------------------------------------------------------------------------------------------------------------------------------------------------------------------------------------------------------------------|----|-----------------------------|
| 164 | <p>Irct20110514006480N.<br/>(2019). Effects of<br/>mindfulness-based stress<br/>reduction and cognitive<br/>behavioral therapy on<br/>patients with rheumatoid<br/>arthritis.</p> <p><a href="https://trialsearch.who.int/Trial2.aspx?TrialID=IRCT20110514006480N18">https://trialsearch.who.int/Trial2.aspx?TrialID=IRCT20110514006480N18</a>.<br/><a href="https://www.cochranelibrary.com/central/doi/10.1002/central/CN-01948336/full">https://www.cochranelibrary.com/central/doi/10.1002/central/CN-01948336/full</a></p> | No | Unpublished clinical trial. |
| 161 | <p>Irct2013051813363N.<br/>(2013). The effect of<br/>progressive muscle<br/>relaxation on quality of life<br/>in rheumatoid arthritis<br/>patients.</p> <p><a href="https://trialsearch.who.int/Trial2.aspx?TrialID=IRCT2013051813363N1">https://trialsearch.who.int/Trial2.aspx?TrialID=IRCT2013051813363N1</a>.<br/><a href="https://www.cochranelibrary.com/central/doi/10.1002/central/CN-01853331/full">https://www.cochranelibrary.com/central/doi/10.1002/central/CN-01853331/full</a></p>                               | No | Unpublished clinical trial. |
| 160 | <p>Irct201308187531N. (2013).<br/>The effect of group<br/>education on self-<br/>management in patient<br/>with rheumatoid arthritis.</p> <p><a href="https://trialsearch.who.int/Trial2.aspx?TrialID=IRCT201308187531N3">https://trialsearch.who.int/Trial2.aspx?TrialID=IRCT201308187531N3</a>.</p>                                                                                                                                                                                                                           | No | Unpublished clinical trial. |

|     |                                                                                                                                                                                                                                                                                                                                                                                                                                                                   |    |                             |
|-----|-------------------------------------------------------------------------------------------------------------------------------------------------------------------------------------------------------------------------------------------------------------------------------------------------------------------------------------------------------------------------------------------------------------------------------------------------------------------|----|-----------------------------|
| 165 | <p><a href="https://www.cochranelibrary.com/central/doi/10.1002/central/CN-01815266/full">https://www.cochranelibrary.com/central/doi/10.1002/central/CN-01815266/full</a><br/>Irct20141012019511N.<br/>(2018). Efficacy of Cognitive-Behavioral Therapy Approach for Adherence and Depression (CBT-AD) on Depression and Non-Adherence to treatment.</p>                                                                                                         | No | Unpublished clinical trial. |
| 162 | <p><a href="https://trialsearch.who.int/Trial2.aspx?TrialID=IRCT20141012019511N3">https://trialsearch.who.int/Trial2.aspx?TrialID=IRCT20141012019511N3</a>.<br/><a href="https://www.cochranelibrary.com/central/doi/10.1002/central/CN-01900490/full">https://www.cochranelibrary.com/central/doi/10.1002/central/CN-01900490/full</a><br/>Irct2015122425685N.<br/>(2016). The effect of self management program on elderly women with rheumatoid arthritis.</p> | No | Unpublished clinical trial. |
| 163 | <p><a href="https://www.cochranelibrary.com/central/doi/10.1002/central/CN-01870631/full">https://www.cochranelibrary.com/central/doi/10.1002/central/CN-01870631/full</a><br/>Irct2016022926846N.<br/>(2016). The effect of interventions based of psychological on the severity of insomnia and</p>                                                                                                                                                             | No | Unpublished clinical trial. |

|     |                                                                                                                                                                                                                                                                                                                                                                                                                                                                                                                                            |    |  |                             |
|-----|--------------------------------------------------------------------------------------------------------------------------------------------------------------------------------------------------------------------------------------------------------------------------------------------------------------------------------------------------------------------------------------------------------------------------------------------------------------------------------------------------------------------------------------------|----|--|-----------------------------|
|     | <p>pain in rheumatoid arthritis.</p> <p><a href="https://trialsearch.who.int/Trial2.aspx?TrialID=IRCT2016022926846N1">https://trialsearch.who.int/Trial2.aspx?TrialID=IRCT2016022926846N1</a>.</p> <p><a href="https://www.cochranelibrary.com/central/doi/10.1002/central/CN-01807984/full">https://www.cochranelibrary.com/central/doi/10.1002/central/CN-01807984/full</a></p> <p>Irct20181128041778N.</p> <p>(2019). Effect of Mindfulness-based stress reduction and Cognitive behavior Therapy in Rheumatoid Arthritis Patients.</p> |    |  |                             |
| 166 | <p><a href="https://trialsearch.who.int/Trial2.aspx?TrialID=IRCT20181128041778N1">https://trialsearch.who.int/Trial2.aspx?TrialID=IRCT20181128041778N1</a>.</p> <p><a href="https://www.cochranelibrary.com/central/doi/10.1002/central/CN-01972351/full">https://www.cochranelibrary.com/central/doi/10.1002/central/CN-01972351/full</a></p> <p>Isrctn. (2003). Education programmes for people with arthritis: a comparative study.</p>                                                                                                 | No |  | Unpublished clinical trial. |
| 167 | <p><a href="https://trialsearch.who.int/Trial2.aspx?TrialID=ISRCTN11478835">https://trialsearch.who.int/Trial2.aspx?TrialID=ISRCTN11478835</a>.</p> <p><a href="https://www.cochranelibrary.com/central/doi/10.1002/central/CN-01798790/full">https://www.cochranelibrary.com/central/doi/10.1002/central/CN-01798790/full</a></p> <p>Isrctn. (2013). Reducing Arthritis Fatigue - clinical</p>                                                                                                                                            | No |  | Unpublished clinical trial. |
| 168 |                                                                                                                                                                                                                                                                                                                                                                                                                                                                                                                                            | No |  | Unpublished clinical trial. |

|     |                                                                                                                                                                                                                                                                                                                                                                                  |    |                          |                                                   |
|-----|----------------------------------------------------------------------------------------------------------------------------------------------------------------------------------------------------------------------------------------------------------------------------------------------------------------------------------------------------------------------------------|----|--------------------------|---------------------------------------------------|
|     | Teams using cognitive behavioural approaches (RAFT).<br><a href="https://trialsearch.who.int/Trial2.aspx?TrialID=ISRCTN52709998">https://trialsearch.who.int/Trial2.aspx?TrialID=ISRCTN52709998</a> .<br><a href="https://www.cochranelibrary.com/central/doi/10.1002/central/CN-01805509/full">https://www.cochranelibrary.com/central/doi/10.1002/central/CN-01805509/full</a> |    |                          |                                                   |
| 169 | Jamilian_2018                                                                                                                                                                                                                                                                                                                                                                    | No | Jamilian et al., 2018    | Full text not available.                          |
| 170 | Jeppesen_2012                                                                                                                                                                                                                                                                                                                                                                    | No | Jeppesen et al., 2012    | Full text not available.                          |
| 171 | Jeppesen_2013                                                                                                                                                                                                                                                                                                                                                                    | No | Jeppesen et al., 2013    | Full text not available.                          |
| 173 | Jolly_2018                                                                                                                                                                                                                                                                                                                                                                       | No | Jolly et al., 2018       | Study population included non-RA patients.        |
| 174 | Kabat-Zinn_1982                                                                                                                                                                                                                                                                                                                                                                  | No | Kabat-Zinn et al., 1985, | Study population included non-RA patients.        |
| 175 | Kabat-Zinn_1985                                                                                                                                                                                                                                                                                                                                                                  | No | Kabat-Zinn et al., 1992  | Study population included non-RA patients.        |
| 176 | Kabat-Zinn_1992                                                                                                                                                                                                                                                                                                                                                                  | No | Kabat-Zinn, 1982         | Study population included non-RA patients.        |
| 446 | Kaplan_1981                                                                                                                                                                                                                                                                                                                                                                      | No | Kaplan & Kozin, 1981     | Full text not available.                          |
| 177 | Kaplan_1993                                                                                                                                                                                                                                                                                                                                                                      | No | Kaplan & Kozin, 1981     | Study population included non-RA patients.        |
| 178 | Kaplan, S., & Kozin, F. (1981). A controlled study of group counseling in rheumatoid arthritis. J Rheumatol, 8(1), 91-99.                                                                                                                                                                                                                                                        | No | Kaplan et al., 1993      | -                                                 |
| 179 | Katz_1998                                                                                                                                                                                                                                                                                                                                                                        | No | Katz, 1998               | Study design was not randomized controlled trial. |
| 380 | Keefe_1990a                                                                                                                                                                                                                                                                                                                                                                      | No | Keefe et al., 1990       | Study population included non-RA patients.        |
| 381 | Keefe_1990b                                                                                                                                                                                                                                                                                                                                                                      | No | Keefe et al., 1990       | Study population included non-RA patients.        |
| 182 | Keefe_1993                                                                                                                                                                                                                                                                                                                                                                       | No | Keefe & Van Horn, 1993   | Study design was not randomized controlled trial. |
| 382 | Keefe_1996                                                                                                                                                                                                                                                                                                                                                                       | No | Keefe et al., 1996       | Study population included non-RA patients.        |

|     |                                                                                                                                                  |    |                        |                                                                |
|-----|--------------------------------------------------------------------------------------------------------------------------------------------------|----|------------------------|----------------------------------------------------------------|
| 181 | Keefe_1997                                                                                                                                       | No | Keefe & Caldwell, 1997 | Study design was not randomized controlled trial.              |
| 183 | Kelley_1997                                                                                                                                      | No | Kelley et al., 1997    | Necessary statistical data for meta-analysis was not provided. |
| 186 | Klompenhouwer_1999                                                                                                                               | No | Klompenhouwer, 1999    | Study design was not randomized controlled trial.              |
| 187 | Knittle_2010                                                                                                                                     | No | Knittle et al., 2010   | Study design was not randomized controlled trial.              |
| 188 | Knittle_2011                                                                                                                                     | No | Knittle et al., 2011   | Intervention was not psychological therapy.                    |
| 189 | Knudson_1981                                                                                                                                     | No | Knudson et al., 1981   | Study design was not randomized controlled trial.              |
| 190 | Koulil_2018                                                                                                                                      | No | Koulil et al., 2018    | Study design was not randomized controlled trial.              |
| 191 | Kowalczevska, J. (1961).<br>[Role of psychotherapy in<br>the treatment of<br>rheumatoid arthritis in<br>young girls]. Reumatol Pol,<br>4, 65-76. | No | Kowalczevska, 1961     | Written language was other than English.                       |
| 193 | Krawitz, M., & Wolman, T.<br>(1979). Group therapy in<br>rheumatoid arthritis. Pa<br>Med, 82(12), 35-37.                                         | No | Krawitz & Wolman, 1979 | Full text not available.                                       |
| 194 | Kuijper_2018                                                                                                                                     | No | Kuijper et al., 2018   | Intervention was not psychological therapy.                    |
| 195 | Kunzler_2020                                                                                                                                     | No | Kunzler et al., 2020   | Study design was not randomized controlled trial.              |
| 196 | Kyngäs_2003                                                                                                                                      | No | Kyngäs, 2003           | Study design was not randomized controlled trial.              |
| 197 | Lacaille_2015                                                                                                                                    | No | Lacaille et al., 2015  | Full text not available.                                       |
| 384 | Laforest_2008                                                                                                                                    | No | Laforest et al., 2008  | Study population included non-RA patients.                     |
| 411 | Laforest_2012                                                                                                                                    | No | Laforest et al., 2012  | Study population included non-RA patients.                     |
| 198 | Lahiri_2018                                                                                                                                      | No | Lahiri et al., 2018    | Full text not available.                                       |
| 412 | Lahiri_2020                                                                                                                                      | No | Lahiri et al., 2022    | Intervention was not psychological therapy.                    |



|     |                                                                                                                                                                                                                                                              |    |                          |                                                   |
|-----|--------------------------------------------------------------------------------------------------------------------------------------------------------------------------------------------------------------------------------------------------------------|----|--------------------------|---------------------------------------------------|
| 199 | Lalloo_2021                                                                                                                                                                                                                                                  | No | Lalloo et al., 2021      | Study population included non-RA patients.        |
| 200 | Lange_1995                                                                                                                                                                                                                                                   | No | Lange, 1995              | Study design was not randomized controlled trial. |
| 201 | Langer, H. E. (1995).<br>[Patient education--a contribution to improvement of long-term management of patients with rheumatism]. Z Rheumatol, 54(4), 207-212.                                                                                                | No | Langer, 1995             | Written language was other than English.          |
| 202 | Langer, H. E., & Birth, U. (1987). [Patient education in chronic polyarthritis. 2. Organizational and curriculum concept of patient seminars for chronic polyarthritis patients]. Z Rheumatol, 46(6), 333-338.                                               | No | Langer & Birth, 1987,    | Written language was other than English.          |
| 203 | Langer, H. E., & Birth, U. (1988). [Patient education in chronic polyarthritis. 3. Intermediate results of a prospective, controlled study of the effectiveness and side effects of patient seminars for polyarthritis patients]. Z Rheumatol, 47(1), 43-51. | No | Langer & Birth, 1988     | Written language was other than English.          |
| 204 | Langer, H. E., & Mattussek, S. (1990). [Patient education in rheumatology]. Wien Med                                                                                                                                                                         | No | Langer & Mattussek, 1990 | Written language was other than English.          |

|     |                                                                                                                                         |    |                           |                                                                |  |
|-----|-----------------------------------------------------------------------------------------------------------------------------------------|----|---------------------------|----------------------------------------------------------------|--|
|     | Wochenschr, 140(12), 349-351.                                                                                                           |    |                           |                                                                |  |
| 205 | Latocha_2020                                                                                                                            | No | Latocha et al., 2020      | Necessary statistical data for meta-analysis was not provided. |  |
| 206 | Lavigne_1992                                                                                                                            | No | Lavigne et al., 1992      | Study population included non-RA patients.                     |  |
| 207 | le Gallez, P. (1984). Patient education and self-management. Nursing (Lond), 2(31), 916-917.                                            | No | le Gallez, 1984           | Full text not available.                                       |  |
| 208 | LeFort_2001                                                                                                                             | No | LeFort, 2001              | Full text not available.                                       |  |
| 209 | Lehew_1970                                                                                                                              | No | Lehew, 1970               | Study design was not randomized controlled trial.              |  |
| 210 | Leibing_1999                                                                                                                            | No | Leibing et al., 1999      | Necessary statistical data for meta-analysis was not provided. |  |
| 413 | Lempp_2017                                                                                                                              | No | Lempp et al., 2017        | Necessary statistical data for meta-analysis was not provided. |  |
| 211 | Leverone_2010                                                                                                                           | No | Leverone & Epstein, 2010  | Study design was not randomized controlled trial.              |  |
| 414 | Li_2005                                                                                                                                 | No | Li et al., 2005           | Intervention was not psychological therapy.                    |  |
| 212 | Li_2017                                                                                                                                 | No | Li et al., 2017           | Study population included non-RA patients.                     |  |
| 415 | Li_2021                                                                                                                                 | No | Li et al., 2021           | Intervention was not psychological therapy.                    |  |
| 385 | Lin_2003                                                                                                                                | No | Lin et al., 2003          | Study population included non-RA patients.                     |  |
| 213 | Lindberg_1988                                                                                                                           | No | Lindberg & Lindberg, 1988 | Study design was not randomized controlled trial.              |  |
| 214 | Lindberg, N. E., & Lindberg, E. (1998). [Psychotherapy can be effective in rheumatoid arthritis]. Lakartidningen, 95(28-29), 3162-3163. | No | Lindberg & Lindberg, 1998 | Written language was other than English.                       |  |
| 215 | Lindberg, N. E., Lindberg, E., Theorell, T., & Larsson, G. (1996). Psychotherapy                                                        | No | Lindberg et al., 1996     | Written language was other than English.                       |  |

in rheumatoid arthritis--a  
parallel-process study of  
psychic state and course of  
rheumatic disease. Z  
Rheumatol, 55(1), 28-39.

|     |                   |    |                            |                                                                |
|-----|-------------------|----|----------------------------|----------------------------------------------------------------|
| 386 | Lindroth_1997     | No | Lindroth et al., 1997      | Necessary statistical data for meta-analysis was not provided. |
| 216 | Logan_2012        | No | Logan & Magem, 2012        | Full text not available.                                       |
| 416 | Logan_2012        | No | Logan & Magem, 2012        | Full text not available.                                       |
| 217 | Lomholt_2015      | No | Lomholt et al., 2015       | Study population included non-RA patients.                     |
| 218 | Lopez-Olivio_2015 | No | Lopez-Olivo et al., 2015   | Full text not available.                                       |
| 219 | Lopez-Olivio_2021 | No | Lopez-Olivo et al., 2021   | Intervention was not psychological therapy.                    |
| 222 | Lorig_1982        | No | Lorig, 1982                | Study design was not randomized controlled trial.              |
| 387 | Lorig_1989        | No | Lorig et al., 1989         | Study population included non-RA patients.                     |
| 220 | Lorig_1993        | No | Lorig & Holman, 1993       | Study design was not randomized controlled trial.              |
| 447 | Lorig_1999        | No | Lorig et al., 1999         | Study population included non-RA patients.                     |
| 223 | Lorig_2004        | No | Lorig et al., 2004         | Study population included non-RA patients.                     |
| 221 | Lorig_2005        | No | Lorig et al., 2005         | Study population included non-RA patients.                     |
| 224 | Lorig_2008        | No | Lorig et al., 2008         | Study population included non-RA patients.                     |
| 226 | Lumley_2012       | No | Lumley et al., 2012        | Study design was not randomized controlled trial.              |
| 418 | Lumley_2018       | No | Lumley et al., 2018        | Other                                                          |
| 228 | Lundgren_1996     | No | Lundgren & Stenström, 1996 | Full text not available.                                       |
| 227 | Lundgren_1999     | No | Lundgren & Stenström, 1999 | Necessary statistical data for meta-analysis was not provided. |
| 229 | Lunkenheimer_2020 | No | Lunkenheimer et al., 2020  | Study population included non-RA patients.                     |

|     |                                                                                                                                                                 |    |                              |                                                                |
|-----|-----------------------------------------------------------------------------------------------------------------------------------------------------------------|----|------------------------------|----------------------------------------------------------------|
| 230 | MacIver_2021                                                                                                                                                    | No | MacIver et al., 2021         | Study design was not randomized controlled trial.              |
| 231 | MacPherson_2013                                                                                                                                                 | No | MacPherson et al., 2013      | Study population included non-RA patients.                     |
| 232 | Maisiak_1996                                                                                                                                                    | No | Maisiak et al., 1996         | Study population included non-RA patients.                     |
| 233 | Makelainen_2009                                                                                                                                                 | No | Mäkeläinen et al., 2009      | Study design was not randomized controlled trial.              |
| 234 | Malysheva_2015                                                                                                                                                  | No | Malysheva et al., 2015       | Intervention was not psychological therapy.                    |
| 235 | Management_2004                                                                                                                                                 | No | Management, 2004             | Full text not available.                                       |
| 236 | Manning_2013                                                                                                                                                    | No | Manning et al., 2013         | Full text not available.                                       |
| 237 | Marchal, J. (1970). [Efficacy of mental imagery, used as therapeutic method in psychosomatic medicine]. Riv Sper Freniatr Med Leg Alien Ment, 94(5), 1292-1309. | No | Marchal, 1970                | Written language was other than English.                       |
| 238 | Markozannes_2017                                                                                                                                                | No | Markozannes et al., 2017     | Study design was not randomized controlled trial.              |
| 239 | Marques_2021                                                                                                                                                    | No | Marques et al., 2021         | Study population included non-RA patients.                     |
| 241 | Martin_2017                                                                                                                                                     | No | Martin et al., 2017          | Intervention was not psychological therapy.                    |
| 240 | Martin_2019                                                                                                                                                     | No | Martin et al., 2019          | Study population included non-RA patients.                     |
| 448 | Mathieux_2009                                                                                                                                                   | No | Mathieux et al., 2009        | Intervention was not psychological therapy.                    |
| 242 | Mayoux-Benhamou_2008                                                                                                                                            | No | Mayoux-Benhamou et al., 2008 | Necessary statistical data for meta-analysis was not provided. |
| 243 | McCarron_2015                                                                                                                                                   | No | McCarron, 2015               | Study design was not randomized controlled trial.              |
| 244 | McCracken, L. M. (1991). Cognitive-behavioral treatment of rheumatoid arthritis: A preliminary review of efficacy and                                           | No | McCracken, 1991              | Full text not available.                                       |

|     |                                                                                                                                                                                                                                     |    |                         |                                                                |
|-----|-------------------------------------------------------------------------------------------------------------------------------------------------------------------------------------------------------------------------------------|----|-------------------------|----------------------------------------------------------------|
|     | methodology. Annals of Behavioral Medicine, 13(2), 57-65.                                                                                                                                                                           |    |                         |                                                                |
| 245 | Mehta_2019                                                                                                                                                                                                                          | No | Mehta et al., 2019      | Study design was not randomized controlled trial.              |
| 246 | Mendelson_2011                                                                                                                                                                                                                      | No | Mendelson et al., 2011  | Study population included non-RA patients.                     |
| 247 | Menefee_2014                                                                                                                                                                                                                        | No | Menefee, 1994           | Study design was not randomized controlled trial.              |
| 420 | Menzies_2022                                                                                                                                                                                                                        | No | Menzies et al., 2022    | Necessary statistical data for meta-analysis was not provided. |
| 248 | Merkes_2010                                                                                                                                                                                                                         | No | Merkes, 2010            | Study design was not randomized controlled trial.              |
| 421 | Michou_2022                                                                                                                                                                                                                         | No | Michou et al., 2022     | Necessary statistical data for meta-analysis was not provided. |
| 249 | Miller_1995                                                                                                                                                                                                                         | No | Miller et al., 1995     | Study population included non-RA patients.                     |
| 250 | Mollard_2018                                                                                                                                                                                                                        | No | Mollard & Michaud, 2018 | Necessary statistical data for meta-analysis was not provided. |
| 423 | Momeni_2020                                                                                                                                                                                                                         | No | Momeni et al., 2020     | Written language was other than English.                       |
| 424 | Mooney_2012                                                                                                                                                                                                                         | No | Mooney, 2012            | Necessary statistical data for meta-analysis was not provided. |
| 251 | Mullen, P. D., Laville, E. A., Biddle, A. K., & Lorig, K. (1987). Efficacy of psychoeducational interventions on pain, depression, and disability in people with arthritis: a meta-analysis. J Rheumatol Suppl, 14 Suppl 15, 33-39. | No | Mullen et al., 1987     | Full text not available.                                       |
| 252 | Mulligan_2003                                                                                                                                                                                                                       | No | Mulligan & Newman, 2003 | Study design was not randomized controlled trial.              |
| 254 | Murphy_2014                                                                                                                                                                                                                         | No | Murphy et al., 2014     | Study population included non-RA patients.                     |

|     |                                                                                                                                                                                                                                                                                                                                                                                                          |    |                       |                                                   |
|-----|----------------------------------------------------------------------------------------------------------------------------------------------------------------------------------------------------------------------------------------------------------------------------------------------------------------------------------------------------------------------------------------------------------|----|-----------------------|---------------------------------------------------|
| 425 | Nazemi_2018                                                                                                                                                                                                                                                                                                                                                                                              | No | Nazemi et al., 2018   | Study design was not randomized controlled trial. |
| 255 | Nct. (2003). Coping Skills Training for Early Rheumatoid Arthritis.<br><a href="https://clinicaltrials.gov/show/NCT00056394">https://clinicaltrials.gov/show/NCT00056394</a> .<br><a href="https://www.cochranelibrary.com/central/doi/10.1002/central/CN-01509211/full">https://www.cochranelibrary.com/central/doi/10.1002/central/CN-01509211/full</a>                                                | No | Nct, 2003             | Unpublished clinical trial.                       |
| 256 | Nct. (2010). Psychosocial Treatment Intervention in Persons Newly Diagnosed With Rheumatoid Arthritis or Diabetes.<br><a href="https://clinicaltrials.gov/show/NCT01066130">https://clinicaltrials.gov/show/NCT01066130</a> .<br><a href="https://www.cochranelibrary.com/central/doi/10.1002/central/CN-01528064/full">https://www.cochranelibrary.com/central/doi/10.1002/central/CN-01528064/full</a> | No | Nct, 2010             | Unpublished clinical trial.                       |
| 257 | Ndosi_2016                                                                                                                                                                                                                                                                                                                                                                                               | No | Ndosi et al., 2016    | Intervention was not psychological therapy.       |
| 258 | Neill_2006                                                                                                                                                                                                                                                                                                                                                                                               | No | Neill et al., 2006    | Study design was not randomized controlled trial. |
| 259 | Newman_2004                                                                                                                                                                                                                                                                                                                                                                                              | No | Newman et al., 2004   | Study design was not randomized controlled trial. |
| 260 | Nguyen_2021                                                                                                                                                                                                                                                                                                                                                                                              | No | Nguyen et al., 2021   | Study population included non-RA patients.        |
| 427 | Nordmark_2006                                                                                                                                                                                                                                                                                                                                                                                            | No | Nordmark et al., 2006 | Intervention was not psychological therapy.       |
| 261 | Ntr. (2007). Psychophysiological stress mechanisms in chronic inflammatory diseases.<br><a href="https://trialsearch.who.int/Trial2.aspx?TrialID=NTR11">https://trialsearch.who.int/Trial2.aspx?TrialID=NTR11</a>                                                                                                                                                                                        | No | Ntr, 2007             | Unpublished clinical trial.                       |

|     |                                                                                                                                                                                                                                                                                                                                                                                                                                                                                                                                                             |    |           |                             |
|-----|-------------------------------------------------------------------------------------------------------------------------------------------------------------------------------------------------------------------------------------------------------------------------------------------------------------------------------------------------------------------------------------------------------------------------------------------------------------------------------------------------------------------------------------------------------------|----|-----------|-----------------------------|
|     | 93.<br><a href="https://www.cochranelibrary.com/central/doi/10.1002/central/CN-01825599/full">https://www.cochranelibrary.com/central/doi/10.1002/central/CN-01825599/full</a>                                                                                                                                                                                                                                                                                                                                                                              |    |           |                             |
| 262 | Ntr. (2009). Tailored cognitive-behavioral E-health care in patients with rheumatoid arthritis.<br><a href="https://trialsearch.who.int/Trial2.aspx?TrialID=NTR2100">https://trialsearch.who.int/Trial2.aspx?TrialID=NTR2100</a> .                                                                                                                                                                                                                                                                                                                          | No | Ntr, 2009 | Unpublished clinical trial. |
| 263 | <a href="https://www.cochranelibrary.com/central/doi/10.1002/central/CN-01863832/full">https://www.cochranelibrary.com/central/doi/10.1002/central/CN-01863832/full</a><br>Ntr. (2012). Effect of mindfulness on patients with rheumatoid arthritis: A controlled effect study.<br><a href="https://trialsearch.who.int/Trial2.aspx?TrialID=NTR3458">https://trialsearch.who.int/Trial2.aspx?TrialID=NTR3458</a> .                                                                                                                                          | No | Ntr, 2012 | Unpublished clinical trial. |
| 264 | <a href="https://www.cochranelibrary.com/central/doi/10.1002/central/CN-01868647/full">https://www.cochranelibrary.com/central/doi/10.1002/central/CN-01868647/full</a><br>Ntr. (2012). Goal management training for patients with arthritis.<br><a href="https://trialsearch.who.int/Trial2.aspx?TrialID=NTR3606">https://trialsearch.who.int/Trial2.aspx?TrialID=NTR3606</a> .<br><a href="https://www.cochranelibrary.com/central/doi/10.1002/central/CN-01868982/full">https://www.cochranelibrary.com/central/doi/10.1002/central/CN-01868982/full</a> | No | Ntr, 2012 | Unpublished clinical trial. |

|     |                                                                                                                                                                                                                                                                          |    |                           |                                                                |
|-----|--------------------------------------------------------------------------------------------------------------------------------------------------------------------------------------------------------------------------------------------------------------------------|----|---------------------------|----------------------------------------------------------------|
| 265 | O'Leary_1988                                                                                                                                                                                                                                                             | No | O'Leary et al., 1988      | Necessary statistical data for meta-analysis was not provided. |
| 429 | Osborne_2007                                                                                                                                                                                                                                                             | No | Osborne et al., 2007      | Study population included non-RA patients.                     |
| 266 | Otop, J. (1978).<br>[Psychotherapy in the<br>rehabilitation of patients<br>with rheumatoid arthritis].<br>Wiad Lek, 31(2), 135-137.                                                                                                                                      | No | Otop, 1978                | Written language was other than English.                       |
| 267 | Ottonello_2007                                                                                                                                                                                                                                                           | No | Ottonello, 2007           | Study design was not randomized controlled trial.              |
| 268 | Panagopoulou_2006                                                                                                                                                                                                                                                        | No | Panagopoulou et al., 2006 | Study design was not randomized controlled trial.              |
| 269 | Parker_1988                                                                                                                                                                                                                                                              | No | Parker et al., 1988       | Necessary statistical data for meta-analysis was not provided. |
| 270 | Parker_1993                                                                                                                                                                                                                                                              | No | Parker et al., 1993       | Study design was not randomized controlled trial.              |
| 272 | Parker_1995                                                                                                                                                                                                                                                              | No | Parker et al., 1995       | Necessary statistical data for meta-analysis was not provided. |
| 273 | Parker_2003                                                                                                                                                                                                                                                              | No | Parker et al., 2003       | Necessary statistical data for meta-analysis was not provided. |
| 271 | Parker, J. C., Singsen, B. H.,<br>Hewett, J. E., Walker, S. E.,<br>Hazelwood, S. E., Hall, P.<br>J., Holsten, D. J., & Rodon,<br>C. M. (1984). Educating<br>patients with rheumatoid<br>arthritis: a prospective<br>analysis. Arch Phys Med<br>Rehabil, 65(12), 771-774. | No | Parker et al., 1984       | Full text not available.                                       |
| 274 | Parlar_2013                                                                                                                                                                                                                                                              | No | Parlar et al., 2013       | Study design was not randomized controlled trial.              |
| 275 | Pei_2020                                                                                                                                                                                                                                                                 | No | Pei et al., 2021          | Study design was not randomized controlled trial.              |



|     |                                                                                                                                                                         |    |                                |                                                                |
|-----|-------------------------------------------------------------------------------------------------------------------------------------------------------------------------|----|--------------------------------|----------------------------------------------------------------|
| 276 | Plummer_2016                                                                                                                                                            | No | Plummer et al., 2016           | Full text not available.                                       |
| 277 | Podgorski_1985                                                                                                                                                          | No | Podgorski & Edmonds, 1985      | Study design was not randomized controlled trial.              |
| 430 | Pot-Vaucel_2016                                                                                                                                                         | No | Potts & Brandt, 1983           | Necessary statistical data for meta-analysis was not provided. |
| 278 | Potts_1983                                                                                                                                                              | No | Pot-Vaucel et al., 2016        | Necessary statistical data for meta-analysis was not provided. |
| 279 | Poulsen_1991                                                                                                                                                            | No | Poulsen, 1991                  | Study design was not randomized controlled trial.              |
| 280 | Poulsen, A., Tvede, N., & Egidius, L. (1988). [The effect of multidisciplinary group advice for patients with rheumatoid arthritis]. Ugeskr Laeger, 150(49), 3047-3050. | No | Poulsen et al., 1988           | Written language was other than English.                       |
| 282 | Prothero_2018                                                                                                                                                           | No | Prothero et al., 2018          | Study design was not randomized controlled trial.              |
| 431 | Prothero_2020                                                                                                                                                           | No | Prothero, 2020                 | Study design was not randomized controlled trial.              |
| 283 | Racaru_2021                                                                                                                                                             | No | Racaru et al., 2021            | Study design was not randomized controlled trial.              |
| 432 | Radhamaniamma_2013                                                                                                                                                      | No | Radhamaniamma et al., 2013     | Intervention was not psychological therapy.                    |
| 284 | Radner_2012                                                                                                                                                             | No | Radner et al., 2012            | Study design was not randomized controlled trial.              |
| 286 | RaunsbaekKnudsen_2021                                                                                                                                                   | No | Raunsbaek Knudsen et al., 2021 | Necessary statistical data for meta-analysis was not provided. |
| 433 | Reid_2013<br>Reiff, H. (1988).<br>[Rheumatoid arthritis:                                                                                                                | No | Reid et al., 2014              | Study population included non-RA patients.                     |
| 287 | reconstruction of the body<br>image exemplified by                                                                                                                      | No | Reiff, 1988                    | Written language was other than English.                       |

|     |                                                                                      |    |                                       |                                                                |
|-----|--------------------------------------------------------------------------------------|----|---------------------------------------|----------------------------------------------------------------|
|     | psychoanalytic therapy].<br>Psychother Psychosom<br>Med Psychol, 38(8), 282-<br>287. |    |                                       |                                                                |
| 288 | Rhee_2000                                                                            | No | Rhee et al., 2000                     | Necessary statistical data for meta-analysis was not provided. |
| 289 | Richards_2012a                                                                       | No | Richards et al., 2012                 | Study design was not randomized controlled trial.              |
| 290 | Richards_2012b                                                                       | No | Richards et al., 2012                 | Study design was not randomized controlled trial.              |
| 292 | Riemsma_2002                                                                         | No | Riemsma et al., 2002                  | Study design was not randomized controlled trial.              |
| 291 | Riemsma_2003a                                                                        | No | Riemsma et al., 2003                  | Study design was not randomized controlled trial.              |
| 294 | Rodríguez-Sánchez-Laulhé_2020                                                        | No | Rodríguez-Sánchez-Laulhé et al., 2020 | Necessary statistical data for meta-analysis was not provided. |
| 295 | Rogers_1982                                                                          | No | Rogers et al., 1982                   | Study design was not randomized controlled trial.              |
| 434 | Ronen_1996                                                                           | No | Ronen et al., 1996                    | Study population included non-RA patients.                     |
| 296 | Rzeszutek_2017                                                                       | No | Rzeszutek et al., 2017                | Study design was not randomized controlled trial.              |
| 297 | Salmon_2015                                                                          | No | Salmon et al., 2015                   | Full text not available.                                       |
| 298 | Salmon_2019                                                                          | No | Salmon et al., 2019                   | Study design was not randomized controlled trial.              |
| 299 | Santos_2018                                                                          | No | Santos et al., 2018                   | Study design was not randomized controlled trial.              |
| 300 | Santos_2019                                                                          | No | Santos et al., 2019                   | Study design was not randomized controlled trial.              |
| 301 | Saperia_2012                                                                         | No | Saperia & Swartzman, 2012             | Study design was not randomized controlled trial.              |
| 302 | Savelkoul_2003                                                                       | No | Savelkoul et al., 2003                | Study design was not randomized controlled trial.              |

|     |                 |    |                           |                                                                |
|-----|-----------------|----|---------------------------|----------------------------------------------------------------|
| 304 | Schwartz_1978   | No | Schwartz et al., 1978     | Study design was not randomized controlled trial.              |
| 303 | Schwartz_2017   | No | Schwartz et al., 2017     | Study design was not randomized controlled trial.              |
| 306 | Shafii_1973     | No | Shafii, 1973              | Study design was not randomized controlled trial.              |
| 307 | Shao_2020       | No | Shao et al., 2020         | Study design was not randomized controlled trial.              |
| 308 | Shao_2021       | No | Shao et al., 2021         | Necessary statistical data for meta-analysis was not provided. |
| 309 | Shariff_2009    | No | Shariff et al., 2009      | Study design was not randomized controlled trial.              |
| 312 | Sharpe_2008     | No | Sharpe et al., 2008       | Necessary statistical data for meta-analysis was not provided. |
| 310 | Sharpe_2013     | No | Sharpe, 2013              | Study design was not randomized controlled trial.              |
| 311 | Sharpe_2016     | No | Sharpe, 2016              | Study design was not randomized controlled trial.              |
| 317 | Shen_2020       | No | Shen et al., 2020         | Study design was not randomized controlled trial.              |
| 318 | Shigaki_2008    | No | Shigaki et al., 2008      | Necessary statistical data for meta-analysis was not provided. |
| 320 | Siedliecki_2006 | No | Siedliecki & Good, 2006   | Intervention was not psychological therapy.                    |
| 323 | Sinclair_1998   | No | Sinclair & Scroggie, 2005 | Necessary statistical data for meta-analysis was not provided. |
| 322 | Sinclair_2001   | No | Sinclair & Wallston, 2001 | Necessary statistical data for meta-analysis was not provided. |
| 321 | Sinclair_2005   | No | Sinclair et al., 1998     | Study population included non-RA patients.                     |
| 435 | Smarr_1997      | No | Smarr et al., 1997        | Necessary statistical data for meta-analysis was not provided. |
| 325 | Smarr_2011      | No | Smarr et al., 2011        | Necessary statistical data for meta-analysis was not provided. |

|     |                                                                                                                                                                                             |    |                             |  |                                                      |
|-----|---------------------------------------------------------------------------------------------------------------------------------------------------------------------------------------------|----|-----------------------------|--|------------------------------------------------------|
|     | Smarr, K., Musser, D.,<br>Hanson, K., Laffey, J.,<br>Johnson, R., Siva, C., &<br>Parker, J. (2005).                                                                                         |    |                             |  |                                                      |
| 324 | Development of an online<br>self-management<br>intervention for persons<br>with rheumatoid arthritis:<br>The RAhelp. org Project.<br>Arthritis and rheumatism,                              | No | Smarr et al., 2005          |  | Full text not available.                             |
| 390 | Smyth_1998                                                                                                                                                                                  | No | Smyth, 1998                 |  | Study design was not randomized controlled<br>trial. |
| 326 | Solomon_2002                                                                                                                                                                                | No | Solomon et al., 2002        |  | Study population included non-RA patients.           |
| 327 | Somers_2010                                                                                                                                                                                 | No | Somers et al., 2010         |  | Study design was not randomized controlled<br>trial. |
| 328 | Southwood_1995                                                                                                                                                                              | No | Southwood, 1995             |  | Study design was not randomized controlled<br>trial. |
| 329 | Spijk-deJonge_2021                                                                                                                                                                          | No | Spijk-de Jonge et al., 2021 |  | Study design was not randomized controlled<br>trial. |
| 330 | Spilberg, F. (1984). A pain<br>management treatment for<br>rheumatoid arthritis<br>patients: Stress inoculation<br>training for pain and<br>cognitive therapy for<br>depression. 1925-1925. | No | Spilberg, 1984              |  | Full text not available.                             |
| 331 | Srikesavan_1984                                                                                                                                                                             | No | Srikesavan et al., 2019     |  | Study design was not randomized controlled<br>trial. |
| 333 | Stinson_2010                                                                                                                                                                                | No | Stinson et al., 2010        |  | Study population included non-RA patients.           |
| 332 | Stinson_2020                                                                                                                                                                                | No | Stinson et al., 2020        |  | Study population included non-RA patients.           |
| 334 | Stinson, J. N., McGrath, P.<br>J., Hodnett, E. E., Feldman,<br>B., Duffy, C. M., Huber, A.,                                                                                                 | No | Stinson et al., 2009        |  | Full text not available.                             |

& Tucker, L. B. (2009).  
Feasibility testing of an  
online self-management  
program for adolescents  
with juvenile idiopathic  
arthritis (JIA): a pilot  
randomized controlled  
trial. Arthritis and  
rheumatism, 60, 238-  
[https://doi.org/10.1002/art.  
25321](https://doi.org/10.1002/art.25321)

|     |               |    |                         |                                                                |
|-----|---------------|----|-------------------------|----------------------------------------------------------------|
| 392 | Stone_2000    | No | Stone et al., 2000      | Study population included non-RA patients.                     |
| 335 | Strating_2006 | No | Strating et al., 2006   | Intervention was not psychological therapy.                    |
| 336 | Strauss_1986  | No | Strauss et al., 1986    | Necessary statistical data for meta-analysis was not provided. |
| 338 | Taal_1993     | No | Taal et al., 1993       | Necessary statistical data for meta-analysis was not provided. |
| 337 | Taal_1997     | No | Taal et al., 1997       | Study design was not randomized controlled trial.              |
| 339 | Tam_2019      | No | Tam et al., 2019        | Necessary statistical data for meta-analysis was not provided. |
| 340 | Test_2020     | No | Test, 2020              | Study design was not randomized controlled trial.              |
| 341 | Thabane_2010  | No | Thabane et al., 2010    | Study design was not randomized controlled trial.              |
| 342 | Thomsen_2020  | No | Thomsen et al., 2020    | Necessary statistical data for meta-analysis was not provided. |
| 343 | Tiliakos_2011 | No | Tiliakos et al., 2011   | Other                                                          |
| 344 | Torem_2007    | No | Torem, 2007             | Study design was not randomized controlled trial.              |
| 438 | Trudeau_2015  | No | Trudeau et al., 2015    | Study population included non-RA patients.                     |
| 345 | Udelman_1978  | No | Udelman & Udelman, 1978 | Study design was not randomized controlled trial.              |

|     |                     |    |                                     |                                                                |
|-----|---------------------|----|-------------------------------------|----------------------------------------------------------------|
| 439 | vanCranenburgh_2015 | No | van Cranenburgh, 2016               | Study design was not randomized controlled trial.              |
| 393 | vanLankveld_2004    | No | van Lankveld et al., 2004           | Study design was not randomized controlled trial.              |
| 348 | vanMiddendorp_2007  | No | van Middendorp et al., 2007         | Study design was not randomized controlled trial.              |
| 346 | vanMiddendorp_2008  | No | van Middendorp & Geenen, 2008       | Necessary statistical data for meta-analysis was not provided. |
| 349 | VanUden-Kraan_2011  | No | Van Uden-Kraan et al., 2011         | Study design was not randomized controlled trial.              |
| 350 | Veitienne_2005      | No | Veitienne & Tamulaitiene, 2005      | Study design was not randomized controlled trial.              |
| 352 | ViletVlieland_1996  | No | Vliet Vlieland et al., 1996         | Necessary statistical data for meta-analysis was not provided. |
| 351 | ViletVlieland_2011  | No | Vliet Vlieland & van den Ende, 2011 | Study design was not randomized controlled trial.              |
| 440 | Vriezekolk_2013     | No | Vriezekolk et al., 2013             | Study population included non-RA patients.                     |
| 353 | Walco_1992          | No | Walco et al., 1992                  | Study population included non-RA patients.                     |
| 354 | Walker_2007         | No | Walker et al., 2007                 | Intervention was not psychological therapy.                    |
| 355 | Walrabenstein_2021  | No | Walrabenstein et al., 2021          | Necessary statistical data for meta-analysis was not provided. |
| 441 | Walrabenstein_2021  | No | Walrabenstein et al., 2021          | Necessary statistical data for meta-analysis was not provided. |
| 442 | Wells-Federman_2002 | No | Wells-Federman et al., 2002         | Study population included non-RA patients.                     |
| 357 | Williams_2020       | No | Williams et al., 2020               | Study design was not randomized controlled trial.              |
| 358 | Wiskin_1998         | No | Wiskin, 1998                        | Study design was not randomized controlled trial.              |
| 359 | Wu_2022             | No | Wu et al., 2022                     | Study design was not randomized controlled trial.              |
| 360 | Ying_2016           | No | Ying et al., 2016                   | Full text not available.                                       |

|     |               |    |                      |                                                                |
|-----|---------------|----|----------------------|----------------------------------------------------------------|
| 394 | Young_1995    | No | Young et al., 1995   | Necessary statistical data for meta-analysis was not provided. |
| 449 | Zangi_2011    | No | Zangi et al., 2012   | Study population included non-RA patients.                     |
| 361 | Zautra_2005   | No | Zautra et al., 2005  | Study design was not randomized controlled trial.              |
| 363 | Zautra_2007   | No | Zautra et al., 2007  | Intervention was not psychological therapy.                    |
| 365 | Zhou_2020     | No | Zhou et al., 2020    | Study design was not randomized controlled trial.              |
| 367 | Zuidema_2015  | No | Zuidema et al., 2015 | Study design was not randomized controlled trial.              |
| 368 | Zuidema_2019b | No | Zuidema et al., 2019 | Study design was not randomized controlled trial.              |
| 369 | Zwikker_2012  | No | Zwikker et al., 2012 | Study design was not randomized controlled trial.              |
