# Supplementary material for: The Effectiveness of Psychological Interventions for Rheumatoid Arthritis (RA): A Systematic Review and Meta-Analysis
Source: MDPI journal article supplement (doi:10.3390/life13030849), 2023-03-21
Supplement: s1 [file s1]

Table S2. Summary table: Study Characteristics

\*UD= undisclosed

| Name of file | References            | Source of sample                                                                               | Exclusion criteria                                    | Total participants (drop out) |         | Female%      |         | Mean age (SD) |         | Average duration of diagnosis | Intervention (s)                         | Control condition          | Duration of intervention | Assessment                     | Outcome measures                     | Results                                                                                                                          |
|--------------|-----------------------|------------------------------------------------------------------------------------------------|-------------------------------------------------------|-------------------------------|---------|--------------|---------|---------------|---------|-------------------------------|------------------------------------------|----------------------------|--------------------------|--------------------------------|--------------------------------------|----------------------------------------------------------------------------------------------------------------------------------|
|              |                       |                                                                                                |                                                       | Experimental                  | Control | Experimental | Control | Experimental  | Control |                               |                                          |                            |                          |                                |                                      |                                                                                                                                  |
| Anvar_2018   | Anvar et al, 2018 [2] | Women who were referred to the rheumatology clinic in the city of Tabriz in northwest of Iran. | cognitive impairment, frail to undertake the research | 40(3)                         | 40(1)   | 100          | 100     | UD*           | UD      | UD                            | Arthritis Self-Management Program (ASMP) | routine medical management | 6 weeks                  | 1) baseline<br>2) 4 - 5 months | Arthritis Self-Efficacy Scale (ASES) | Significant increases were found for self-efficacy pain scale in the intervention group compared to the control group (p=0.000). |

|                |                           |                                                                                 |                                                                     |      |      |       |       |           |           |           |                                                                         |                            |         |                                                     |                                                                                                     |                                                                                                                                                                                                                               |
|----------------|---------------------------|---------------------------------------------------------------------------------|---------------------------------------------------------------------|------|------|-------|-------|-----------|-----------|-----------|-------------------------------------------------------------------------|----------------------------|---------|-----------------------------------------------------|-----------------------------------------------------------------------------------------------------|-------------------------------------------------------------------------------------------------------------------------------------------------------------------------------------------------------------------------------|
| Appelbaum_1988 | Appelbaum et al, 1988 [3] | All patients were from Albany, New York, Veterans Administration Medical Center | not meeting the criteria defined by the Arthritis Foundation (1981) | 9(0) | 9(0) | 11,11 | 11,11 | 61.9(9.2) | 62.6(8.8) | 9-20 year | Cognitive-Behavioural Pain Management, Relaxation training, Biofeedback | routine medical management | 6 weeks | 1) baseline<br>2) post-intervention<br>3) 18 months | Weekly Arthritis Diary (WAD), McGill Pain Questionnaire (MPQ), Daily Activities Questionnaire (DAQ) | There were significant intercorrelations on WAD measures concerned with pain report and with sleep parameters. Significant pre-post effects for weekly pain index, weekly peak pain rating, and morning stiffness were noted. |
|----------------|---------------------------|---------------------------------------------------------------------------------|---------------------------------------------------------------------|------|------|-------|-------|-----------|-----------|-----------|-------------------------------------------------------------------------|----------------------------|---------|-----------------------------------------------------|-----------------------------------------------------------------------------------------------------|-------------------------------------------------------------------------------------------------------------------------------------------------------------------------------------------------------------------------------|

|                |                           |                                                                        |                                           |                |                |          |          |                            |                            |                   |                             |                            |               |                                       |                                                                                                                                                                     |                                                                                                                                                                                                                                                                                                                                                                                              |
|----------------|---------------------------|------------------------------------------------------------------------|-------------------------------------------|----------------|----------------|----------|----------|----------------------------|----------------------------|-------------------|-----------------------------|----------------------------|---------------|---------------------------------------|---------------------------------------------------------------------------------------------------------------------------------------------------------------------|----------------------------------------------------------------------------------------------------------------------------------------------------------------------------------------------------------------------------------------------------------------------------------------------------------------------------------------------------------------------------------------------|
| Arvidsson_2012 | Arvidsson et al, 2013 [4] | All patients were from a rheumatology unit in the southwest of Sweden. | lack of knowledge of the Swedish language | 38(0)          | 124(0)         | 0,71     | 0,73     | 56. 4(7.2)                 | 55.2 (13.2)                | RA<1 year         | Self-management , Education | routine medical management | 1 year        | 1) baseline<br>2) 1 wk<br>3) 6 months | Short Form-36 Health Survey (SF-36), Swedish Rheumatic Disease Empowerment Scale (SWE-RES-23), Appraisal of Self-Care Agency Scale (ASA-A),Sense of Coherence (SOC) | The experimental group scored statistically significant improvement between baseline and 6-month post-intervention in waking during the night (P = 0046) and feeling fatigue the last week (P = 0048). In the control group, there was a statistically significant deterioration between 1-week post-intervention and 6-month post-intervention in feeling rested after sleep (P = 0. 0048). |
| Barsky_2010    | Barsky et al, 2010 [5]    | Most subjects were identified through the hospital's                   | fibromyalgia, serious medical comorbidity | 68(0)<br>44(0) | 56(0)<br>56(0) | 90<br>82 | 87<br>87 | 54.3 (13.1)<br>54.0 (12.3) | 51.9 (13.4)<br>51.9 (13.4) | 13 years since RA | CBT<br>Relaxation training  | Arthritis Education        | 8- to 12-week | 1) baseline<br>2) 12 months           | Rheumatoid Arthritis Symptom Questionnaire                                                                                                                          | Significant benefits were found for pain, other RA                                                                                                                                                                                                                                                                                                                                           |

computerized patient registry, which was queried for all patients with a diagnosis of RA. A smaller number of subjects volunteered for the study in response to public announcements and advertisements.

diagno  
sis

e (RASQ), symptoms,  
Arthritis self-care  
Impact activities, and  
Measuremen social  
t Scale activities.  
(AIMS)

|                |                           |                                                                                                                                                                |                                                                                                                                                                                                                                                                                                                                                                                                                                      |       |       |       |       |               |               |                    |                                             |                                       |         |                                     |                                                                                                                                                      |                                                                                                                                                     |
|----------------|---------------------------|----------------------------------------------------------------------------------------------------------------------------------------------------------------|--------------------------------------------------------------------------------------------------------------------------------------------------------------------------------------------------------------------------------------------------------------------------------------------------------------------------------------------------------------------------------------------------------------------------------------|-------|-------|-------|-------|---------------|---------------|--------------------|---------------------------------------------|---------------------------------------|---------|-------------------------------------|------------------------------------------------------------------------------------------------------------------------------------------------------|-----------------------------------------------------------------------------------------------------------------------------------------------------|
| Bernateck_2008 | Bernateck et al, 2008 [6] | Participants were recruited by the outpatient clinic of the Department of Rheumatology, Hannover Medical School, or through announcements in local newspapers. | receiving systemic corticoid treatment >7.5 mg/day prednisolone, tumor necrosis factor alpha (TNF- $\alpha$ ) inhibitors, transcutaneous electrical nerve stimulation (TENS) or physiotherapy, a new pharmacological treatment for RA or analgesia in the last 8 weeks, receiving acupuncture treatment during the last 6 months, pregnancy or lactation, malignant or psychiatric diseases, therapy using a cardiac pulse generator | 18(0) | 19(0) | 88,88 | 73,68 | 52.22 (11.19) | 51.05 (13.18) | RA $\geq$ 6 months | Autogenic training                          | Adjuvant Auricular Electroacupuncture | 6 weeks | 1) baseline<br>2) post-intervention | Erythrocyte sedimentation rate (ESR), Tumor Necrosis Factor (TNF- $\alpha$ ), Calcitonin gene related peptide (CGRP), Substance Interleukin 6 and 10 | The adjuvant use of both EA and AT in the treatment of RA resulted in significant short- and long-term treatment effects in all outcome parameters. |
| Bradley_1987   | Bradley, L. A., 1989 [7]  | Participants were recruited from the Section on Rheumatology of                                                                                                | not meeting the criteria of American Rheumatism                                                                                                                                                                                                                                                                                                                                                                                      | 17(0) | 18(0) | UD    | UD    | 47.65 (13.92) | 50.50 (11.14) | 11 years           | Biofeedback-assisted, cognitive-behavioural | no adjunct treatment (NAT)            | UD      | 1) post-intervention<br>2) 6        | Visual Analogue Scale (VAS), Rheumatoid                                                                                                              | Significant reductions were found in trait anxiety,                                                                                                 |

|                                           |                                            |       |       |    |    |                  |                  |                                                                                        |                       |                                                                                                                                                                                                                                                                                                                                                                                                                                                                                                                                                    |                                                         |
|-------------------------------------------|--------------------------------------------|-------|-------|----|----|------------------|------------------|----------------------------------------------------------------------------------------|-----------------------|----------------------------------------------------------------------------------------------------------------------------------------------------------------------------------------------------------------------------------------------------------------------------------------------------------------------------------------------------------------------------------------------------------------------------------------------------------------------------------------------------------------------------------------------------|---------------------------------------------------------|
| the Bowman<br>Gray School of<br>Medicine. | Association<br>for a<br>diagnosis of<br>RA | 18(0) | 18(0) | UD | UD | 52.00(12.5<br>1) | 50.50<br>(11.14) | group<br>therapy<br>(CBT)<br>Structured<br>group social<br>support<br>therapy<br>(SGT) | month<br>follow<br>up | Activity<br>Index (RAI),<br>Subject<br>assessment<br>of disease<br>activity,<br>Rheumatolo<br>gist or nurse<br>assessment<br>of disease<br>activity,<br>Articular<br>index, Grip<br>strength,<br>Rheumatoid<br>factor tier ,<br>Erythrocyte<br>sedimentatio<br>n rate (ESR),<br>State-Trait<br>Anxiety<br>Inventory<br>(STAI),Depr<br>ession<br>Adjective<br>Check List<br>(DACL) ,<br>Change in<br>skin<br>temperature<br>with<br>/without<br>biofeedback,<br>Health<br>Locus of<br>Control<br>(HLC),<br>Arthritis<br>Helplessness<br>Index (AHI) | patients' pain<br>behaviour and<br>disease<br>activity. |
|-------------------------------------------|--------------------------------------------|-------|-------|----|----|------------------|------------------|----------------------------------------------------------------------------------------|-----------------------|----------------------------------------------------------------------------------------------------------------------------------------------------------------------------------------------------------------------------------------------------------------------------------------------------------------------------------------------------------------------------------------------------------------------------------------------------------------------------------------------------------------------------------------------------|---------------------------------------------------------|

|                |                           |                                                                             |                                                                                                                                                                                                                                                                                                                         |               |               |          |          |                           |                            |                        |                                                                                    |                            |          |                            |                                                                                                                |                                                                                                                                                                                                           |
|----------------|---------------------------|-----------------------------------------------------------------------------|-------------------------------------------------------------------------------------------------------------------------------------------------------------------------------------------------------------------------------------------------------------------------------------------------------------------------|---------------|---------------|----------|----------|---------------------------|----------------------------|------------------------|------------------------------------------------------------------------------------|----------------------------|----------|----------------------------|----------------------------------------------------------------------------------------------------------------|-----------------------------------------------------------------------------------------------------------------------------------------------------------------------------------------------------------|
| Breedland_2011 | Breedland et al, 2011 [8] | Participants were recruited from a rehabilitation centre in the Netherlands | severe disease activity (Disease Activity Score [DAS-28], cardiac or pulmonary diseases resulting in restrictions in their ability to follow a physical exercise program, a Steinbrocker classification of functional capacity, no stable medication for the RA, intraarticular injections during the time of the study | 13(0)         | 13(0)         | UD       | UD       | 45 (11.9)                 | 51.8 (9.4)                 | 10 years               | The FIT program: physical exercise, educational component, improving self-efficacy | routine medical management | 8 weeks  | 1) baseline<br>2) 9 wk     | Vo2 max, Microfet, Arthritis Impact Measurement Scales - 2 (Dutch-AIMS2), Arthritis Self-Efficacy Scale (ASES) | The intervention group showed significant improvement in V O2max and also significant within-group changes were found over time for muscle strength of the upper and lower extremities and health status. |
| Brus_1997b     | Brus et al, 1997 [9]      | UD                                                                          | had not entered the practices of 3 rheumatologists less than 8 years ago                                                                                                                                                                                                                                                | 7(0)<br>25(0) | 6(0)<br>22(0) | UD<br>UD | UD<br>UD | 51.6 (9.3)<br>50.2 (10.8) | 50.2 (11.2)<br>49.0 (11.0) | 5-8 years<br>3-4 years | Patient education                                                                  | ESR > 28<br>ESR < 28       | 4 months | 1) baseline<br>2) 4 months | Physical, endurance and relaxation exercises, Arthritis Impact Measurement                                     | There were no significant differences between the adherence parameters of the various                                                                                                                     |

and not  
fulfilled the  
American  
College of  
Rheumatolo  
gy criteria  
for RA

t Scales  
(Dutch-  
AIMS),  
Modified  
Health  
Assessment  
Questionnair  
e (M-HAQ  
pairs of  
groups.



|           |                       |                                                                                                                                                                                 |                                                                                                                                                                                                                                                                                                          |        |        |       |       |            |             |           |                                   |                            |           |                                                        |                                                                                |                                                                                                     |
|-----------|-----------------------|---------------------------------------------------------------------------------------------------------------------------------------------------------------------------------|----------------------------------------------------------------------------------------------------------------------------------------------------------------------------------------------------------------------------------------------------------------------------------------------------------|--------|--------|-------|-------|------------|-------------|-----------|-----------------------------------|----------------------------|-----------|--------------------------------------------------------|--------------------------------------------------------------------------------|-----------------------------------------------------------------------------------------------------|
| Conn_2013 | Conn et al, 2013 [10] | Participants were RA patients meeting entrance criteria from the Grady Hospital Arthritis Clinic in Atlanta, GA, USA. Most were African American and financially disadvantaged. | limited mental capacity from a congenital brain disorder, psychosis, depression, drug dependency, uncontrolled chronic diseases, chronic lung disease, uncontrolled congestive heart failure, stroke, stage renal disease, sickle cell anemia, HIV-AIDS, insulin-dependent complicated diabetes mellitus | 40(12) | 34(18) | 28703 | 28703 | 54.2 (8.2) | 52.9 (10.2) | 6-7 years | Arthritis self-management program | routine medical management | 18 months | 1) baseline<br>2) 6 months<br>3)12 month<br>4)18 month | Swollen joint count, Tender joint count, Health Assessment Questionnaire (HAQ) | There were no significant differences between the groups, excepted the swollen joint count (p=0.02) |
|-----------|-----------------------|---------------------------------------------------------------------------------------------------------------------------------------------------------------------------------|----------------------------------------------------------------------------------------------------------------------------------------------------------------------------------------------------------------------------------------------------------------------------------------------------------|--------|--------|-------|-------|------------|-------------|-----------|-----------------------------------|----------------------------|-----------|--------------------------------------------------------|--------------------------------------------------------------------------------|-----------------------------------------------------------------------------------------------------|

|             |                         |                                                                                                                                    |                                                                                                                               |       |       |    |    |    |    |    |             |                            |         |                                     |                                                                                                                                                                       |                                                                                                                                                                                                                                                                                                                                                                                              |
|-------------|-------------------------|------------------------------------------------------------------------------------------------------------------------------------|-------------------------------------------------------------------------------------------------------------------------------|-------|-------|----|----|----|----|----|-------------|----------------------------|---------|-------------------------------------|-----------------------------------------------------------------------------------------------------------------------------------------------------------------------|----------------------------------------------------------------------------------------------------------------------------------------------------------------------------------------------------------------------------------------------------------------------------------------------------------------------------------------------------------------------------------------------|
| Dalili_2019 | Dalili et al, 2011 [11] | RA patients, who visited the clinic of Jam Rheumatology Centres and met other inclusion criteria in Mashhad in the spring of 2018. | absence of more than 2 sessions, non-attendance, counselling and psychotherapy, sessions, psychotic disorders, and addiction. | 14(0) | 14(0) | UD | UD | UD | UD | UD | UD          | routine medical management | 8 weeks | 1) baseline<br>2) 8 wks.            | Depression Anxiety Stress Scales (DASS-21)                                                                                                                            | MBCT had a significant effect ( $p < 0.0001$ ) on the perception of the disease and the psychological syndrome in the experimental group compared to the control group.                                                                                                                                                                                                                      |
| Davis_2015  | Davis et al, 2015 [12]  | Participants were from the Phoenix, AZ metropolitan area.                                                                          | diagnosis of Lupus Erythematosus, receiving a cyclical estrogen-replacement therapy                                           | 47(0) | 44(0) | UD | UD | UD | UD | UD | Mindfulness | Arthritis Education        | 30 days | 1) baseline<br>2) post-intervention | Coping Strategies Questionnaire (CSQ), Arthritis Self-Efficacy Scale (ASES), Fatigue, Morning stiffness, Positive and Negative Affect Scale - Expanded Form (PANAS-X) | The M group reported higher overall levels of pain control than did the CBT-P ( $p < 0.01$ ) and E groups ( $p < 0.02$ ). CBT-P group showed improvement in levels of catastrophizing ( $p < 0.0003$ ), in disability ( $p < 0.0001$ ), and fatigue ( $p < 0.0002$ ). The E group showed improvement in levels of perceived pain control ( $p < 0.02$ ) and disability ( $p < 0.0001$ ), but |
|             |                         |                                                                                                                                    |                                                                                                                               | 52(0) | 44(0) | UD | UD | UD | UD | UD | CBT         |                            |         |                                     |                                                                                                                                                                       |                                                                                                                                                                                                                                                                                                                                                                                              |

|                 |                            |                                                                                                                                                                  |                                                                                                                                                                                                                                                                                                                                                                                      |       |       |    |    |             |            |            |                            |                            |         |                                                |                                                                                       |                                                                                                                                                                                                                                                                                                                                                                                                                                                                                                  |
|-----------------|----------------------------|------------------------------------------------------------------------------------------------------------------------------------------------------------------|--------------------------------------------------------------------------------------------------------------------------------------------------------------------------------------------------------------------------------------------------------------------------------------------------------------------------------------------------------------------------------------|-------|-------|----|----|-------------|------------|------------|----------------------------|----------------------------|---------|------------------------------------------------|---------------------------------------------------------------------------------------|--------------------------------------------------------------------------------------------------------------------------------------------------------------------------------------------------------------------------------------------------------------------------------------------------------------------------------------------------------------------------------------------------------------------------------------------------------------------------------------------------|
| DeBrouwer_2011b | DeBrouwer et al, 2011 [13] | RA were recruited from the Department of Rheumatology at the Radboud University Nijmegen Medical Centre and the St Maartenskliniek in Nijmegen, the Netherlands. | severe physical comorbidity (e.g., major cardiac problems, psoriasis, malignancies, severe respiratory or renal insufficiency, hepatitis B, HIV, and insulin-dependent diabetes mellitus); severe psychiatric disturbances that might interfere with the study protocol; pregnancy; illiteracy; use of antidepressants, anxiolytics, or antipsychotics; and psychological treatment. | 40(6) | 34(9) | UD | UD | 57.26(11.8) | 60.76(9.2) | 12-15 year | Stress management training | routine medical management | 2 weeks | 1) baseline<br>2) post intervention<br>3) 9 wk | Impact of Rheumatic diseases on General Health (IRGL), Disease Activity Score (DAS28) | worsening in levels of catastrophizing ( $p < 0.02$ ). At the follow-up assessment, the tension was significantly lower in patients in the intervention group than in patients in the control group ( $p = 0.02$ ). There was a significantly diminished cortisol response ( $p = 0.03$ ) and a trend towards a lower total cortisol output (AUCg) in the intervention group compared with the control group ( $p = 0.06$ ). The autonomic response was similar in the two groups ( $p = 0.59$ ) |
|-----------------|----------------------------|------------------------------------------------------------------------------------------------------------------------------------------------------------------|--------------------------------------------------------------------------------------------------------------------------------------------------------------------------------------------------------------------------------------------------------------------------------------------------------------------------------------------------------------------------------------|-------|-------|----|----|-------------|------------|------------|----------------------------|----------------------------|---------|------------------------------------------------|---------------------------------------------------------------------------------------|--------------------------------------------------------------------------------------------------------------------------------------------------------------------------------------------------------------------------------------------------------------------------------------------------------------------------------------------------------------------------------------------------------------------------------------------------------------------------------------------------|

|            |                        |                                                                                                                           |                                                       |       |       |    |    |             |             |         |     |                            |          |                                            |                                                                                                                                                                                                                                                        |                                                                                                                                                                                                                                                                                                                                                                                                                                                                                                                                                                                                            |
|------------|------------------------|---------------------------------------------------------------------------------------------------------------------------|-------------------------------------------------------|-------|-------|----|----|-------------|-------------|---------|-----|----------------------------|----------|--------------------------------------------|--------------------------------------------------------------------------------------------------------------------------------------------------------------------------------------------------------------------------------------------------------|------------------------------------------------------------------------------------------------------------------------------------------------------------------------------------------------------------------------------------------------------------------------------------------------------------------------------------------------------------------------------------------------------------------------------------------------------------------------------------------------------------------------------------------------------------------------------------------------------------|
| Evers_2002 | Evers et al, 2002 [15] | Patients were randomly selected from patient medical records of three rheumatology outpatient clinics in the Netherlands. | any other psychological group or individual treatment | 30(0) | 29(0) | 70 | 72 | 53.9 (10.3) | 53.5 (12.6) | 3 years | CBT | routine medical management | 6 months | 1) baseline<br>2) 6 months<br>3) follow up | Disease Activity Score (DAS28), Impact of Rheumatic diseases on General Health (IRGL), Checklist Individual Strength (CIS), Beck Depression Inventory (BDI), Illness Cognition Questionnaire, Utrechtse Coping List (UCL), Pain Coping Inventory (PCI) | Patients in the CBT condition used significantly more active coping strategies when dealing with stress at post-treatment (P<0,01), but not at follow-up assessment (P=0,16). Helplessness significantly decreased in the CBT condition at post-treatment and follow-up assessment (P<0,01 and P<0,05). There was no change in control condition. Compliance with RA medication significantly increased in the CBT condition at follow-up assessment (P<0:05), but not at post-treatment (P=0:57), while compliance tended to decrease in the control condition at post-treatment and follow-up assessment |
|------------|------------------------|---------------------------------------------------------------------------------------------------------------------------|-------------------------------------------------------|-------|-------|----|----|-------------|-------------|---------|-----|----------------------------|----------|--------------------------------------------|--------------------------------------------------------------------------------------------------------------------------------------------------------------------------------------------------------------------------------------------------------|------------------------------------------------------------------------------------------------------------------------------------------------------------------------------------------------------------------------------------------------------------------------------------------------------------------------------------------------------------------------------------------------------------------------------------------------------------------------------------------------------------------------------------------------------------------------------------------------------------|

( $P=0,06$ ;  $P=$   
 $0,08$ )

|               |                           |                                                                                                       |                                                                                                                                                                                |        |       |    |    |               |              |         |                    |                            |                |                                                                                                    |                                                                                                                                                                                                                                                                                                                |                                                                                                                                                                                                                                                                                                                                                                                                                                                                                                                                                                            |
|---------------|---------------------------|-------------------------------------------------------------------------------------------------------|--------------------------------------------------------------------------------------------------------------------------------------------------------------------------------|--------|-------|----|----|---------------|--------------|---------|--------------------|----------------------------|----------------|----------------------------------------------------------------------------------------------------|----------------------------------------------------------------------------------------------------------------------------------------------------------------------------------------------------------------------------------------------------------------------------------------------------------------|----------------------------------------------------------------------------------------------------------------------------------------------------------------------------------------------------------------------------------------------------------------------------------------------------------------------------------------------------------------------------------------------------------------------------------------------------------------------------------------------------------------------------------------------------------------------------|
| Ferwerda_2017 | Ferwerda et al, 2017 [16] | Patients were from Radboud University Medical Centre and from 3 non-academic hospitals in Netherland. | pregnancy, insufficient command of the Dutch language, severe physical or psychiatric comorbidity , current treatment by a CBT therapist, no access to a computer and internet | 46(11) | 59(2) | 61 | 66 | 55.45 (10.69) | 57.14 (9.36) | 4 years | Internet-based CBT | routine medical management | 9 and 65 weeks | 1) baseline<br>2) post intervention<br>3) 3 months.<br>4) 6 months<br>5) 9 months<br>6) 12 months. | Beck Depression Inventory (BDI), Impact of Rheumatic diseases on General Health (IRGL), Psychological functioning, Checklist Individual Strength (CIS), Physical functioning, RAND-36 Health Status Inventory (RAND-36), Impact on daily life, Rheumatoid Arthritis Disease Activity Index (RADAI), Compliance | Patients who received the internet-based intervention reported a larger improvement in psychological functioning compared with the control group, indicating less depressed mood (P <0.001), negative mood (P < 0.01), and anxiety (P<0.001) during the 1-year follow-up period. The intervention group reporting less fatigue than the control group (P< 0.06), whereas no effect was found on pain. No effects were found for the impact of RA on daily life, except for the intervention group experiencing fewer role limitations due to emotional problems (P<0.001). |
|---------------|---------------------------|-------------------------------------------------------------------------------------------------------|--------------------------------------------------------------------------------------------------------------------------------------------------------------------------------|--------|-------|----|----|---------------|--------------|---------|--------------------|----------------------------|----------------|----------------------------------------------------------------------------------------------------|----------------------------------------------------------------------------------------------------------------------------------------------------------------------------------------------------------------------------------------------------------------------------------------------------------------|----------------------------------------------------------------------------------------------------------------------------------------------------------------------------------------------------------------------------------------------------------------------------------------------------------------------------------------------------------------------------------------------------------------------------------------------------------------------------------------------------------------------------------------------------------------------------|

|              |                          |                                                                   |                                                                                    |       |       |    |    |         |         |          |                                           |                            |         |                                                           |                                                                               |                                                                                                                                                                                                                                                                                                                    |
|--------------|--------------------------|-------------------------------------------------------------------|------------------------------------------------------------------------------------|-------|-------|----|----|---------|---------|----------|-------------------------------------------|----------------------------|---------|-----------------------------------------------------------|-------------------------------------------------------------------------------|--------------------------------------------------------------------------------------------------------------------------------------------------------------------------------------------------------------------------------------------------------------------------------------------------------------------|
| Fogarty_2019 | Fogarty et al, 2019 [17] | Patients were from two public hospitals in Auckland, New Zealand. | not according to the 1987 American College of Rheumatology classification criteria | 21(0) | 21(0) | 91 | 86 | 52 (12) | 55 (13) | 10 years | Mindfulness-based stress reduction (MBSR) | routine medical management | 8 weeks | 1) baseline<br>2) 2 months<br>3) 4 months<br>4) 6 months. | Disease Activity Score (DAS28), Hospital and Anxiety Depression Scale (HADS), | In the MBSR group, greater reduction in DAS28-CRP scores was observed compared with the control group (P=0.01) The MBSR group also showed greater improvements in duration of morning stiffness (P=0.03) and pain scores (P=0.04). These effects were evident post-intervention and at both follow-up time points. |
|--------------|--------------------------|-------------------------------------------------------------------|------------------------------------------------------------------------------------|-------|-------|----|----|---------|---------|----------|-------------------------------------------|----------------------------|---------|-----------------------------------------------------------|-------------------------------------------------------------------------------|--------------------------------------------------------------------------------------------------------------------------------------------------------------------------------------------------------------------------------------------------------------------------------------------------------------------|

|                           |                                       |                                         |                                                                                                                                               |        |        |       |       |               |               |             |                             |                            |        |                         |                                                                                                                                                                                                                                                                                                                                                                                                                              |                                                                                                                                                                                                                                                                                                                                                    |
|---------------------------|---------------------------------------|-----------------------------------------|-----------------------------------------------------------------------------------------------------------------------------------------------|--------|--------|-------|-------|---------------|---------------|-------------|-----------------------------|----------------------------|--------|-------------------------|------------------------------------------------------------------------------------------------------------------------------------------------------------------------------------------------------------------------------------------------------------------------------------------------------------------------------------------------------------------------------------------------------------------------------|----------------------------------------------------------------------------------------------------------------------------------------------------------------------------------------------------------------------------------------------------------------------------------------------------------------------------------------------------|
| Giraudet-Le Quintrec_2007 | Giraudet-Le Quintrec et al, 2007 [18] | Patients were from same medical centre. | current juvenile chronic arthritis, Steinbrocker class IV, pregnancy, presence of RA flare, or patient not able to understand the information | 100(0) | 100(0) | 86.41 | 85.44 | 55.32 (11.80) | 54.31 (14.37) | 11-14 years | Intensive education program | routine medical management | 8 week | 1) baseline<br>2) 1 yr. | Nocturnal awakenings, Morning stiffness, Disease Activity Score (DAS28), Health Assessment Questionnaire (HAQ), Hospital and Anxiety Depression Scale (HADS), Arthritis Helplessness Index (AHI), Arthritis Impact Measurement Scales 2 Short Form (AIMS2-SF), Functional Assessment of Chronic Illness Therapy (FACIT), Baecke Physical Activity Questionnaire (BPAQ), Knowledge Questionnaire (KQ), Patient's satisfaction | After 1 year, no statistically significant difference was observed between the 2 groups in change in HAQ score (p = 0.79). Statistically significant differences were found in 3 domains: patient coping (p = 0.03), knowledge (p < 0.0001), and satisfaction (p = 0.02), all of which were better for the group attending the education sessions. |
|---------------------------|---------------------------------------|-----------------------------------------|-----------------------------------------------------------------------------------------------------------------------------------------------|--------|--------|-------|-------|---------------|---------------|-------------|-----------------------------|----------------------------|--------|-------------------------|------------------------------------------------------------------------------------------------------------------------------------------------------------------------------------------------------------------------------------------------------------------------------------------------------------------------------------------------------------------------------------------------------------------------------|----------------------------------------------------------------------------------------------------------------------------------------------------------------------------------------------------------------------------------------------------------------------------------------------------------------------------------------------------|



|               |                         |                                                      |                                                                                                            |       |       |    |    |    |    |           |                            |                            |                          |                         |                            |                                                                                                                                                                                                                                                                                                                                                                                              |
|---------------|-------------------------|------------------------------------------------------|------------------------------------------------------------------------------------------------------------|-------|-------|----|----|----|----|-----------|----------------------------|----------------------------|--------------------------|-------------------------|----------------------------|----------------------------------------------------------------------------------------------------------------------------------------------------------------------------------------------------------------------------------------------------------------------------------------------------------------------------------------------------------------------------------------------|
| Hammond_2004b | Hammond et al 2004 [19] | Participants were followed up from an earlier study. | under 18 and over 65 years, not diagnosed with RA by a rheumatology consultant within the last five years; | 65(0) | 62(0) | UD | UD | 52 | 51 | 1-2 years | Joint-protection programme | routine medical management | Two 8-hour interventions | 1) baseline<br>2) 4 yr. | Visits to doctor last 6/12 | At four years, the joint protection group continued to have significantly better: joint protection adherence (p=0.001); early morning stiffness (p=0.01); AIMS2 activities of daily living (ADL) scores (p=0.04) compared with the standard group. The joint protection group also had significantly fewer hand deformities: metacarpophalangeal (MCP) (p =0.02) and wrist joints (p =0.04). |
|---------------|-------------------------|------------------------------------------------------|------------------------------------------------------------------------------------------------------------|-------|-------|----|----|----|----|-----------|----------------------------|----------------------------|--------------------------|-------------------------|----------------------------|----------------------------------------------------------------------------------------------------------------------------------------------------------------------------------------------------------------------------------------------------------------------------------------------------------------------------------------------------------------------------------------------|

|               |                          |                                                                               |                                                                                                                                          |        |        |       |       |    |    |         |                                     |                            |          |                           |                                                                                                                                                                                                                                                                                                                                                                                                                                                                 |                                                                                                                                                                                                                                                                                                                                                                                                                                                                                                                                                                                   |
|---------------|--------------------------|-------------------------------------------------------------------------------|------------------------------------------------------------------------------------------------------------------------------------------|--------|--------|-------|-------|----|----|---------|-------------------------------------|----------------------------|----------|---------------------------|-----------------------------------------------------------------------------------------------------------------------------------------------------------------------------------------------------------------------------------------------------------------------------------------------------------------------------------------------------------------------------------------------------------------------------------------------------------------|-----------------------------------------------------------------------------------------------------------------------------------------------------------------------------------------------------------------------------------------------------------------------------------------------------------------------------------------------------------------------------------------------------------------------------------------------------------------------------------------------------------------------------------------------------------------------------------|
| Hewlett_2019b | Hewlett et al, 2019 [20] | Patients were approached in clinic or by mailshots to departmental databases. | recent changes to glucocorticoids (6 weeks) or major RA medication (16 weeks) or insufficient English to participate in group discussion | 156(0) | 152(0) | 29221 | 29007 | UD | UD | 10 year | Reducing arthritis Fatigue with CBT | routine medical management | 26 weeks | 1) baseline<br>2) 26 wks. | Bristol Rheumatoid Arthritis - Numerical Rating Scale (BRAFRS), Bristol Rheumatoid Arthritis - Multidimensional Questionnaire (BRAFM-DQ), Numerical Rating Scale (NRS), Modified Health Assessment Questionnaire (M-HAQ), Arthritis Impact Measurement Scale (AIMS), Simplified Patient-Devised Disease Activity (SPDAS2), Hospital and Anxiety Depression Scale (HADS), Valued Life Activities (VLA), Arthritis Helplessness Index (AHI), Rheumatoid Arthritis | At 26 weeks, the adjusted difference between arms for fatigue impact change favoured RAFT (BRAFNRS Effect -0.59, 95%CI -1.11 to -0.06), BRAFMultidimensional Questionnaire (MDQ) Total -3.42 (95% CI -6.44 to -0.39), Living with Fatigue -1.19 (95% CI -2.17 to -0.21), Emotional Fatigue -0.91 (95% CI -1.58 to -0.23); RA Self-Efficacy (RASE, +3.05, 95%CI 0.43 to 5.66) (14 secondary outcomes unchanged). Effects persisted at 2 years: BRAFNRS Effect -0.49 (95% CI -0.83 to -0.14), BRAFM-DQ Total -2.98 (95% CI -5.39 to -0.57), Living with Fatigue -0.93 (95% CI -1.75 |
|---------------|--------------------------|-------------------------------------------------------------------------------|------------------------------------------------------------------------------------------------------------------------------------------|--------|--------|-------|-------|----|----|---------|-------------------------------------|----------------------------|----------|---------------------------|-----------------------------------------------------------------------------------------------------------------------------------------------------------------------------------------------------------------------------------------------------------------------------------------------------------------------------------------------------------------------------------------------------------------------------------------------------------------|-----------------------------------------------------------------------------------------------------------------------------------------------------------------------------------------------------------------------------------------------------------------------------------------------------------------------------------------------------------------------------------------------------------------------------------------------------------------------------------------------------------------------------------------------------------------------------------|

Self-Efficacy to -0.10),  
Scale (RASE) Emotional  
Fatigue -0.90  
(95%  
CI -1.44, to -  
0.37); BRAF-  
NRS Coping  
+0.42 (95% CI  
0.08 to 0.77)  
(relevance of  
fatigue impact  
improvement  
uncertain).

|              |                          |                                                               |                                                                                      |       |       |       |    |           |          |            |                           |                            |          |                         |                                                                                                                                                                                                                                                                                                                                   |                                                                                                                                  |
|--------------|--------------------------|---------------------------------------------------------------|--------------------------------------------------------------------------------------|-------|-------|-------|----|-----------|----------|------------|---------------------------|----------------------------|----------|-------------------------|-----------------------------------------------------------------------------------------------------------------------------------------------------------------------------------------------------------------------------------------------------------------------------------------------------------------------------------|----------------------------------------------------------------------------------------------------------------------------------|
| Hewlett_2011 | Hewlett et al, 2011 [21] | Participants were from two teaching hospitals in Bristol, UK. | change in disease-modifying drugs or biological agents within the preceding 24 weeks | 40(0) | 43(0) | 27485 | 71 | 58.25(12) | 61.1(10) | 14-16 year | CBT and self-management : | routine medical management | 18 weeks | 1) baseline<br>2) 18wks | Multi-Dimensional Assessment of Fatigue (MAF), Visual Analogue Scale (VAS), Health Assessment Questionnaire (HAQ-DI), Personal Impact HAQ (PIHAQ), Rheumatoid Arthritis Quality-of-Life (RAQoL), Hospital and Anxiety Depression Scale (HADS), Arthritis Helplessness Index (AHI), Rheumatoid Arthritis Self-Efficacy Scale (RASE | At 18 weeks CBT participants reported better scores than control participants for fatigue impact: MAF (p=0.008); VAS ( p<0.001). |
|--------------|--------------------------|---------------------------------------------------------------|--------------------------------------------------------------------------------------|-------|-------|-------|----|-----------|----------|------------|---------------------------|----------------------------|----------|-------------------------|-----------------------------------------------------------------------------------------------------------------------------------------------------------------------------------------------------------------------------------------------------------------------------------------------------------------------------------|----------------------------------------------------------------------------------------------------------------------------------|

|           |                       |                                                                                              |                                 |       |       |       |       |               |               |            |                                              |                            |         |                                           |                                                                                                                                                                                                                                                             |                                                                                                                                                                                                                                                                                                                                                                       |
|-----------|-----------------------|----------------------------------------------------------------------------------------------|---------------------------------|-------|-------|-------|-------|---------------|---------------|------------|----------------------------------------------|----------------------------|---------|-------------------------------------------|-------------------------------------------------------------------------------------------------------------------------------------------------------------------------------------------------------------------------------------------------------------|-----------------------------------------------------------------------------------------------------------------------------------------------------------------------------------------------------------------------------------------------------------------------------------------------------------------------------------------------------------------------|
| John_2013 | John et al, 2013 [22] | Participants were recruited from a secondary care setting from a single rheumatology centre. | <18 years, not speaking English | 52(0) | 58(0) | 71.15 | 74.14 | 62.19 (10.59) | 60.81 (10.67) | 11-14 year | Cognitive behavioural education intervention | routine medical management | 8 weeks | 1) baseline<br>2) 2 months<br>3) 6 months | Heart Disease Fact Questionnaire<br>e<br>Rheumatoid Arthritis (HDFQ-RA),<br>Attitude to behaviour change,<br>Perceived behavioural intentions to control over behaviour change,<br>Behavioural intention towards behaviour change,<br>Body Mass Index (BMI) | At 6 months, those in the intervention group had significantly higher knowledge scores (P < 0.001); improved behavioural intentions to increase exercise (P < 0.001), eat a low-fat diet (P = 0.01) and lose weight (P = 0.06); and lower mean diastolic blood pressure by 3.7 mmHg, whereas the control group's mean diastolic blood pressure increased by 0.8 mmHg. |
|-----------|-----------------------|----------------------------------------------------------------------------------------------|---------------------------------|-------|-------|-------|-------|---------------|---------------|------------|----------------------------------------------|----------------------------|---------|-------------------------------------------|-------------------------------------------------------------------------------------------------------------------------------------------------------------------------------------------------------------------------------------------------------------|-----------------------------------------------------------------------------------------------------------------------------------------------------------------------------------------------------------------------------------------------------------------------------------------------------------------------------------------------------------------------|

|            |                        |                                                                                                                                             |                                                                                                                                                                                                                                                                          |       |       |    |    |    |    |          |                                         |                            |          |                                                           |                                                                                                                                      |                                                                                                                                                                                                            |
|------------|------------------------|---------------------------------------------------------------------------------------------------------------------------------------------|--------------------------------------------------------------------------------------------------------------------------------------------------------------------------------------------------------------------------------------------------------------------------|-------|-------|----|----|----|----|----------|-----------------------------------------|----------------------------|----------|-----------------------------------------------------------|--------------------------------------------------------------------------------------------------------------------------------------|------------------------------------------------------------------------------------------------------------------------------------------------------------------------------------------------------------|
| Keefe_2008 | Keefe et al, 2008 [23] | Patients were recruited from clinics affiliated with the Ohio University College of Osteopathic Medicine or Duke University Medical School. | other organic disease that would significantly affect function or rheumatic disorders other than RA. Patients with severe personality disorders (e.g., borderline personality disorder), substance abuse problems, or who were involved in current psychiatric treatment | 17(2) | 16(4) | UD | UD | UD | UD | 14 years | Private Emotional disclosure            | routine medical management | 2 months | 1) baseline<br>2) 2 months<br>3) 5 months<br>4) 15 months | Arthritis Impact Measurement Scale (AIMS), Positive and Negative Affect Scale (PANAS), Daily Stress Inventory (DSI), Pain behaviours | There were some benefits in terms of a reduction in pain behaviour with private disclosure vs. clinician-assisted disclosure at the 2-month follow-up, but no other significant between group differences. |
|            |                        |                                                                                                                                             |                                                                                                                                                                                                                                                                          | 24(2) | 16(4) | UD | UD | UD | UD |          | Clinician assisted Emotional disclosure | routine medical management |          |                                                           |                                                                                                                                      |                                                                                                                                                                                                            |
|            |                        |                                                                                                                                             |                                                                                                                                                                                                                                                                          | 29(4) | 16(4) | UD | UD | UD | UD |          | Arthritis education                     | routine medical management |          |                                                           |                                                                                                                                      |                                                                                                                                                                                                            |

|            |                        |                                                                                                                    |                                                                                                                                                                                  |       |       |       |       |             |             |            |                               |                            |         |                          |                                                                     |                                                                                                                                                      |
|------------|------------------------|--------------------------------------------------------------------------------------------------------------------|----------------------------------------------------------------------------------------------------------------------------------------------------------------------------------|-------|-------|-------|-------|-------------|-------------|------------|-------------------------------|----------------------------|---------|--------------------------|---------------------------------------------------------------------|------------------------------------------------------------------------------------------------------------------------------------------------------|
| Kilic_2021 | Kilic et al, 2021 [24] | Patients, who applied to the rheumatology outpatient clinic of a university hospital between January and May 2018. | diagnosed with RA for less than 6 months,<18 years old, using continuous sleep medications, any physical problems that would prevent doing the exercises, any cognitive disorder | 35(0) | 37(0) | 28126 | 28581 | 46.3 (13.4) | 56.6(1 1.2) | 8-10 years | Progressive muscle relaxation | routine medical management | 6 weeks | 1) baseline<br>2) 6 wks. | Pittsburgh Sleep Quality Index (PSQI), Fatigue Severity Scale (FSS) | A statistical difference was found between the two groups in terms of the Pittsburgh Sleep Quality Index's and Fatigue Severity Scale's mean scores. |
|------------|------------------------|--------------------------------------------------------------------------------------------------------------------|----------------------------------------------------------------------------------------------------------------------------------------------------------------------------------|-------|-------|-------|-------|-------------|-------------|------------|-------------------------------|----------------------------|---------|--------------------------|---------------------------------------------------------------------|------------------------------------------------------------------------------------------------------------------------------------------------------|

|             |                         |                                                                                                      |    |       |       |       |      |       |       |             |                   |                            |         |                                                                                      |                                                                   |                                                                                                                                                                                                                                                                                                                                                                                                |
|-------------|-------------------------|------------------------------------------------------------------------------------------------------|----|-------|-------|-------|------|-------|-------|-------------|-------------------|----------------------------|---------|--------------------------------------------------------------------------------------|-------------------------------------------------------------------|------------------------------------------------------------------------------------------------------------------------------------------------------------------------------------------------------------------------------------------------------------------------------------------------------------------------------------------------------------------------------------------------|
| Kirwan_2005 | Kirwan et al, 2005 [25] | Patients who had previously attended an outpatient education programme were excluded from the study. | UD | 30(0) | 28(0) | 23071 | 75.0 | 20546 | 20821 | 13-16 years | Patient education | routine medical management | 8 weeks | 1) baseline<br>2) 4 weeks<br>3) 8 weeks<br>4) 12 weeks<br>5) 24 weeks<br>6) 36 weeks | Visual Analogue Scale (VAS), Arthritis Self-Efficacy Scale (ASES) | In those randomized to be offered education, knowledge of RA and its treatment increased by 18% compared to 9% in controls (p = 0.058). Self-efficacy for pain improved between weeks 0 and 4 by 10.3% (p = 0.015) in those offered education, and by 14.1% in those who were offered and accepted education (p = 0.001) but the difference from controls was not maintained after four weeks. |
|-------------|-------------------------|------------------------------------------------------------------------------------------------------|----|-------|-------|-------|------|-------|-------|-------------|-------------------|----------------------------|---------|--------------------------------------------------------------------------------------|-------------------------------------------------------------------|------------------------------------------------------------------------------------------------------------------------------------------------------------------------------------------------------------------------------------------------------------------------------------------------------------------------------------------------------------------------------------------------|



|                |                            |                                                                     |                                                                                                             |       |       |    |    |    |    |         |     |                            |          |                                         |                                                        |                                                                                                                                                                                   |
|----------------|----------------------------|---------------------------------------------------------------------|-------------------------------------------------------------------------------------------------------------|-------|-------|----|----|----|----|---------|-----|----------------------------|----------|-----------------------------------------|--------------------------------------------------------|-----------------------------------------------------------------------------------------------------------------------------------------------------------------------------------|
| Kraaimaat_1995 | Kraaimaat et al, 1995 [27] | Participants were from 4 hospitals in the center of the Netherlands | difficulty ambulating due to aging or medical problems, Class IV RA patients with the most advanced disease | 24(0) | 19(0) | UD | UD | UD | UD | >1 year | CBT | routine medical management | 10 weeks | 1) baseline<br>2) 10 wks<br>3) 6 months | Impact of Rheumatic diseases on General Health (IRGL), | CBT resulted in minor changes in pain coping behaviour at posttreatment, and showed an increase of knowledge of RA. No therapeutic effects about health status were demonstrated. |
|----------------|----------------------------|---------------------------------------------------------------------|-------------------------------------------------------------------------------------------------------------|-------|-------|----|----|----|----|---------|-----|----------------------------|----------|-----------------------------------------|--------------------------------------------------------|-----------------------------------------------------------------------------------------------------------------------------------------------------------------------------------|

|             |                         |                                                                                                                                         |                                                                                                                                                                                                                                                                                                                                                                                                                 |       |       |    |    |    |    |          |                              |                                       |         |                                                        |                                                                                                                                                                                                                                                           |                                                                                                                                                                                                                                                                                                                                                                   |
|-------------|-------------------------|-----------------------------------------------------------------------------------------------------------------------------------------|-----------------------------------------------------------------------------------------------------------------------------------------------------------------------------------------------------------------------------------------------------------------------------------------------------------------------------------------------------------------------------------------------------------------|-------|-------|----|----|----|----|----------|------------------------------|---------------------------------------|---------|--------------------------------------------------------|-----------------------------------------------------------------------------------------------------------------------------------------------------------------------------------------------------------------------------------------------------------|-------------------------------------------------------------------------------------------------------------------------------------------------------------------------------------------------------------------------------------------------------------------------------------------------------------------------------------------------------------------|
| Lumley_2011 | Lumley et al, 2011 [29] | Adults who met American College of Rheumatology criteria for nonjuvenile RA from one of several urban or suburban rheumatology clinics. | a lack of RA-related pain and disability, physician suspected or diagnosed cognitive impairment (dementia or psychosis), non-English speaking, the presence of another autoimmune rheumatic disease or other major medical condition for which they were receiving treatment, being physically unable to write or walk, participation in another clinical trial, or planning to leave the area within 6 months. | 43(0) | 45(0) | 80 | UD | UD | UD | 11 years | Writing emotional disclosure | positive or neutral events (combined) | 1 month | 1) baseline<br>2) 1month<br>3) 3 months<br>4) 6 months | McGill Pain Questionnaire - Short Form (MPQ-SF), Arthritis Impact Measurement Scales - 2 (AIMS2), Pain behaviours, Grip strength, Walking speed, Swollen joint count, Physician's global rating of disease activity, Erythrocyte sedimentation rate (ESR) | The written disclosure had minimal effects in pain compared with combined control. Spoken disclosure led to faster walking speed at 3 months, and reduced pain, swollen joints, and physician-rated disease activity at 6 months. Written disclosure improved affective pain and walking speed. Spoken disclosure showed only a marginal benefit on sensory pain. |
|-------------|-------------------------|-----------------------------------------------------------------------------------------------------------------------------------------|-----------------------------------------------------------------------------------------------------------------------------------------------------------------------------------------------------------------------------------------------------------------------------------------------------------------------------------------------------------------------------------------------------------------|-------|-------|----|----|----|----|----------|------------------------------|---------------------------------------|---------|--------------------------------------------------------|-----------------------------------------------------------------------------------------------------------------------------------------------------------------------------------------------------------------------------------------------------------|-------------------------------------------------------------------------------------------------------------------------------------------------------------------------------------------------------------------------------------------------------------------------------------------------------------------------------------------------------------------|

|       |       |       |    |    |    |             |                                     |                                                                                                                                                     |         |                                                                     |
|-------|-------|-------|----|----|----|-------------|-------------------------------------|-----------------------------------------------------------------------------------------------------------------------------------------------------|---------|---------------------------------------------------------------------|
| 48(0) | 45(0) | 84,4  | UD | UD | UD | 11<br>years | Speaking<br>emotional<br>disclosure | positive or<br>neutral<br>events<br>(combined)                                                                                                      | 1 month | 1)<br>baseline<br>2) 1<br>month<br>3) 3<br>months<br>4) 6<br>months |
| 43(0) | 24(0) | 79    | UD | UD | UD | 11<br>years | Writing<br>emotional<br>disclosure  | Positive<br>Control -<br>write about<br>Positive<br>emotional<br>events look at<br>Positive<br>aspects avoid<br>dwelling on<br>negative<br>features | 1 month | 1)<br>baseline<br>2)<br>1month<br>3) 3<br>months<br>4) 6<br>months  |
| 43(0) | 21(0) | 31229 | UD | UD | UD | 11<br>years | Speaking<br>emotional<br>disclosure | Positive<br>Control -<br>write about<br>Positive<br>emotional<br>events look at<br>Positive<br>aspects avoid<br>dwelling on<br>negative<br>features | 1 month | 1)<br>baseline<br>2) 1<br>month<br>3) 3<br>months<br>4) 6<br>month  |
| 43(0) | 21(0) | 31229 | UD | UD | UD | 11<br>years | Speaking<br>emotional<br>disclosure | Neutral<br>Control                                                                                                                                  | 1 month | 1)<br>baseline<br>2)<br>1month<br>3) 3<br>months<br>4) 6<br>month   |

|             |                         |                                                                                                                                                                    |                                                                                                                                                                             |       |       |    |    |    |    |          |                              |                 |          |                                                         |                                                                                            |                                                                                                                                                                                                                                    |
|-------------|-------------------------|--------------------------------------------------------------------------------------------------------------------------------------------------------------------|-----------------------------------------------------------------------------------------------------------------------------------------------------------------------------|-------|-------|----|----|----|----|----------|------------------------------|-----------------|----------|---------------------------------------------------------|--------------------------------------------------------------------------------------------|------------------------------------------------------------------------------------------------------------------------------------------------------------------------------------------------------------------------------------|
|             |                         |                                                                                                                                                                    |                                                                                                                                                                             | 48(0) | 21(0) | 81 | UD | UD | UD | 11 years | Writing emotional disclosure | Neutral Control | 1 month  | 1) baseline<br>2) 1 month<br>3) 3 months<br>4) 6 months |                                                                                            |                                                                                                                                                                                                                                    |
| Multon_2001 | Multon et al, 2001 [32] | All study participants were recruited from a midwestern Department of Veterans Affairs hospital, a university medical center, and a private rheumatology practice. | a history of organic brain disorder, presence of a psychotic disorder, presence of an uncontrolled medical disorder, presence of a major communication disorder, illiteracy | 44(0) | 44(0) | UD | UD | UD | UD | 12 years | Stress management with CBT   | Neutral Control | 10 weeks | 1) baseline<br>2) 10 weeks<br>3) 3-month<br>4) 15-month | Pain behaviours (McGill Pain Questionnaire), Arthritis Impact Measurement Scales (AIMS 5 ) | The 3 groups did not differ significantly in the change in pain behaviour at any of the assessment periods. However, persons with RA who had less disease activity tended to exhibit positive changes in pain behaviour over time. |
|             |                         |                                                                                                                                                                    |                                                                                                                                                                             | 42(0) | 44(0) | UD | UD | UD | UD | 12 years | Patient education            | Neutral Control | 11 weeks | 1) baseline<br>2) 10 wks<br>3) 3-month<br>4) 15-month   |                                                                                            |                                                                                                                                                                                                                                    |

|                |                            |                                                                                                                                                                                                                                                          |                                                                                                                                                                                                          |       |       |    |    |       |         |            |                                           |                            |         |                                           |                                                                                                                                                        |                                                                                                                                 |
|----------------|----------------------------|----------------------------------------------------------------------------------------------------------------------------------------------------------------------------------------------------------------------------------------------------------|----------------------------------------------------------------------------------------------------------------------------------------------------------------------------------------------------------|-------|-------|----|----|-------|---------|------------|-------------------------------------------|----------------------------|---------|-------------------------------------------|--------------------------------------------------------------------------------------------------------------------------------------------------------|---------------------------------------------------------------------------------------------------------------------------------|
| Pradhan_2007   | Pradhan et al, 2007 [35]   | Patients were recruited through advertisements in Baltimore newspapers, presentations to rheumatologists, presentations at community health fairs, and informational flyers widely distributed through the Maryland Chapter of the Arthritis Foundation. | major psychiatric illness, active alcohol or drug dependency, diagnosis of fibromyalgia, inability to attend study sessions, concurrent participation in another clinical trial, scheduled major surgery | 28(3) | 32(0) | 84 | 91 | 56(9) | 53 (11) | 6-11 years | Mindfulness-based stress reduction (MBSR) | routine medical management | 8 weeks | 1) baseline<br>2) 2 months<br>3) 6 months | Symptom Checklist-90-Revised (SCL-90-R), Psychological Well-Being Scales, Mindfulness Attention Awareness Scale (MAAS), Disease Activity Score (DAS28) | There was a 35% reduction in psychological distress among those treated. The intervention had no impact on RA disease activity. |
| Radojevic_1992 | Radojevic et al, 1992 [36] | Participants were recruited from a major university medical centre and from private rheumatologists in the San Diego area.                                                                                                                               | difficulty ambulating due to aging or medical problems, Class IV RA patients with the most advanced disease                                                                                              | 15(0) | 15(0) | UD | UD | UD    | UD      | 12 years   | Behaviour Therapy with Family Support     | routine medical management | 6 weeks | 1) baseline<br>2) 6 wk<br>3) 2month       | Arthritis Impact Measurement Scale (AIMS), Centre for Epidemiological Studies - Depression Scale (CES-D), Pain                                         | The behavioural interventions demonstrated significantly greater improvement in joint exam pain at follow-up and reduced        |

|       |       |    |    |    |    |                              |                            |                                        |                                                                                                                                                                                                                                                                                                                                                      |
|-------|-------|----|----|----|----|------------------------------|----------------------------|----------------------------------------|------------------------------------------------------------------------------------------------------------------------------------------------------------------------------------------------------------------------------------------------------------------------------------------------------------------------------------------------------|
| 14(0) | 15(0) | UD | UD | UD | UD | Behavior Therapy             | routine medical management | Management Inventory (PMI), Joint Exam | swelling severity and number of swollen joints at posttreatment and follow-up when contrasted with the two control conditions. The behavioural intervention with family support was superior to all other conditions combined on swelling measures at posttreatment but did not differ from the behaviour therapy without family group at follow up. |
| 15(0) | 15(0) | UD | UD | UD | UD | Education and Family support | routine medical management |                                        |                                                                                                                                                                                                                                                                                                                                                      |

|               |                          |                                                                                                                                               |                                                                           |        |       |    |    |             |            |            |                                                               |                            |        |                                                         |                                                                                                                                                                                                                                                                                     |                                                                                                                                                                                                                                                                                                                                             |
|---------------|--------------------------|-----------------------------------------------------------------------------------------------------------------------------------------------|---------------------------------------------------------------------------|--------|-------|----|----|-------------|------------|------------|---------------------------------------------------------------|----------------------------|--------|---------------------------------------------------------|-------------------------------------------------------------------------------------------------------------------------------------------------------------------------------------------------------------------------------------------------------------------------------------|---------------------------------------------------------------------------------------------------------------------------------------------------------------------------------------------------------------------------------------------------------------------------------------------------------------------------------------------|
| Riemsma_2003b | Riemsma et al, 2003 [37] | Participants were recruited from the outpatient clinics of all 7 rheumatologists from 2 hospitals in the province of Twente, the Netherlands. | residence in a nursing home, younger than 20 years or older than 70 years | 61(10) | 73(3) | 58 | 62 | 57.2 (10.3) | 57.0 (8.3) | 11.7 (9.8) | group education with participation of their significant other | routine medical management | 5 week | 1) baseline<br>2) 2 month<br>3) 6 month<br>4) 12 months | Arthritis Self-Efficacy Scale (ASES), Endurance - Physical - Relaxation exercises, Self-management , Coping with Rheumatoid Stressors Questionnaire (CORS), Dutch version, Social Support Scale, Arthritis Impact Measurement Scales - 2 (Dutch-AIMS2), Visual Analogue Scale (VAS) | Self-efficacy scores for coping with other symptoms were significantly higher for patients participating in the group education without a partner and significantly lower for patients participating in the group education with a partner. Fatigue increased in patients participating in the group education without a significant other. |
|---------------|--------------------------|-----------------------------------------------------------------------------------------------------------------------------------------------|---------------------------------------------------------------------------|--------|-------|----|----|-------------|------------|------------|---------------------------------------------------------------|----------------------------|--------|---------------------------------------------------------|-------------------------------------------------------------------------------------------------------------------------------------------------------------------------------------------------------------------------------------------------------------------------------------|---------------------------------------------------------------------------------------------------------------------------------------------------------------------------------------------------------------------------------------------------------------------------------------------------------------------------------------------|

|        |       |    |    |                |               |               |                                            |                                  |
|--------|-------|----|----|----------------|---------------|---------------|--------------------------------------------|----------------------------------|
| 58(13) | 73(3) | 66 | 62 | 55.1<br>(10.3) | 57.0<br>(8.3) | 11.7<br>(9.8) | group<br>education<br>for patients<br>only | routine<br>medical<br>management |
|--------|-------|----|----|----------------|---------------|---------------|--------------------------------------------|----------------------------------|



|              |                          |                                                                                               |                                                                                                                                  |       |       |       |       |                |                |                |                                                                                  |                    |         |                                                         |                                                                                                                                                                                                                                                                                                                                                                      |                                                                                                                                                                                                                                                                                                                                                                          |
|--------------|--------------------------|-----------------------------------------------------------------------------------------------|----------------------------------------------------------------------------------------------------------------------------------|-------|-------|-------|-------|----------------|----------------|----------------|----------------------------------------------------------------------------------|--------------------|---------|---------------------------------------------------------|----------------------------------------------------------------------------------------------------------------------------------------------------------------------------------------------------------------------------------------------------------------------------------------------------------------------------------------------------------------------|--------------------------------------------------------------------------------------------------------------------------------------------------------------------------------------------------------------------------------------------------------------------------------------------------------------------------------------------------------------------------|
| Shadick_2013 | Shadick et al, 2013 [39] | Participants were recruited from the Brigham and Women's Hospital Arthritis Center in Boston. | if they were in remission according to their rheumatologist, or currently taking part c in an arthritis self-managemen t program | 38(0) | 40(0) | 33664 | 31898 | 57.8<br>(13.8) | 58.5<br>(12.0) | 14-19<br>years | Internal<br>Family<br>Systems-<br>based<br>Psychothera<br>peutic<br>Intervention | Education<br>group | 9 month | 1) baseline<br>2) 3 month<br>3) 6 month<br>4) 21 months | Disease Activity Score-28-C-reactive Protein 4 (DAS-CRP4), Rheumatoid Arthritis Disease Activity Index (RADAI), Beck Depression Inventory (BDI), State Trait Anxiety Index (STAI), Self-Compassion Scale (SCS), Arthritis Self-Efficacy Scale (ASES), Short Form-12 (SF-12), Visual Analogue Scale (VAS), Multidimens ional Health Assessment Questionnair e (M-HAQ) | Posttreatment improvements favouring the IFS group occurred in overall pain (p = 0.04) and physical function (p = 0.04]. Posttreatment improvements were sustained 1 year later in self-assessed joint pain (p=0.04], self-compassion (p = 0.01) and depressive symptoms (p= 0.01). There were no sustained improvements in anxiety, self-efficacy, or disease activity. |
|--------------|--------------------------|-----------------------------------------------------------------------------------------------|----------------------------------------------------------------------------------------------------------------------------------|-------|-------|-------|-------|----------------|----------------|----------------|----------------------------------------------------------------------------------|--------------------|---------|---------------------------------------------------------|----------------------------------------------------------------------------------------------------------------------------------------------------------------------------------------------------------------------------------------------------------------------------------------------------------------------------------------------------------------------|--------------------------------------------------------------------------------------------------------------------------------------------------------------------------------------------------------------------------------------------------------------------------------------------------------------------------------------------------------------------------|

|             |                         |                                                           |                                                          |       |       |       |       |                  |                  |                           |                                     |                            |         |                                       |                                                                                                                                                                                                                                                                        |                                                                                                                                                                                                                                                                                                                                              |
|-------------|-------------------------|-----------------------------------------------------------|----------------------------------------------------------|-------|-------|-------|-------|------------------|------------------|---------------------------|-------------------------------------|----------------------------|---------|---------------------------------------|------------------------------------------------------------------------------------------------------------------------------------------------------------------------------------------------------------------------------------------------------------------------|----------------------------------------------------------------------------------------------------------------------------------------------------------------------------------------------------------------------------------------------------------------------------------------------------------------------------------------------|
| Sharpe_2001 | Sharpe et al, 2012 [40] | rheumatology clinics at three hospitals in or near London | known history of mental illness or alcohol or drug abuse | 23(0) | 22(0) | 25324 | 26481 | 54.14<br>(14.29) | 56.86<br>(12.75) | 12.63<br>(8.22)<br>months | Cognitive-behavioural therapy (CBT) | routine medical management | 8 weeks | 1) baseline<br>2) post<br>3) 6 months | Hospital and Anxiety Depression Scale (HADS), Coping Strategies Questionnaire (CSQ), Self-monitored level of subjective pain, Health Assessment Questionnaire (HAQ-DI), Ritchie Articular Index (RAI), Erythrocyte sedimentation rate (ESR), C-reactive protein (CRP), | Significant differences were found between the groups at both post-treatment and 6-month follow-up in depressive symptoms. While the CBT group showed a reduction in depressive symptoms, the same symptoms increased in the Standard group. At outcome but not follow-up, the CBT group also showed reduction in C-reactive protein levels. |
|-------------|-------------------------|-----------------------------------------------------------|----------------------------------------------------------|-------|-------|-------|-------|------------------|------------------|---------------------------|-------------------------------------|----------------------------|---------|---------------------------------------|------------------------------------------------------------------------------------------------------------------------------------------------------------------------------------------------------------------------------------------------------------------------|----------------------------------------------------------------------------------------------------------------------------------------------------------------------------------------------------------------------------------------------------------------------------------------------------------------------------------------------|

|             |                         |                                                           |                                                                                                                                                   |       |       |    |    |    |    |                   |                                    |                            |         |                                            |                                                                                                                                                                                                                                                                       |                                                                                                                                                                                                                                                                                                          |
|-------------|-------------------------|-----------------------------------------------------------|---------------------------------------------------------------------------------------------------------------------------------------------------|-------|-------|----|----|----|----|-------------------|------------------------------------|----------------------------|---------|--------------------------------------------|-----------------------------------------------------------------------------------------------------------------------------------------------------------------------------------------------------------------------------------------------------------------------|----------------------------------------------------------------------------------------------------------------------------------------------------------------------------------------------------------------------------------------------------------------------------------------------------------|
| Sharpe_2003 | Sharpe et al, 2001 [41] | rheumatology clinics at three hospitals in or near London | history of psychotic illness, current alcohol or drug abuse or poor English language skills, insufficient to complete the assessment or treatment | 23(4) | 22(4) | UD | UD | UD | UD | 12.6 (8.2) months | Cognitive-behavioral therapy (CBT) | routine medical management | 2 weeks | 1) baseline<br>2) 6 months<br>3) 18 months | Hospital and Anxiety Depression Scale (HADS), Coping Strategies Questionnaire (CSQ), Self-monitored level of subjective pain, Health Assessment Questionnaire (HAQ-DI), Ritchie Articular Index (RAI), Erythrocyte sedimentation rate (ESR), C-reactive protein (CRP) | Significant differences were found between the groups in depressive symptoms. The intervention group maintained improvements in joint function, although those in routine care made similar improvements over the ensuing 18 months. At follow-up, group differences emerged for disability and anxiety. |
|-------------|-------------------------|-----------------------------------------------------------|---------------------------------------------------------------------------------------------------------------------------------------------------|-------|-------|----|----|----|----|-------------------|------------------------------------|----------------------------|---------|--------------------------------------------|-----------------------------------------------------------------------------------------------------------------------------------------------------------------------------------------------------------------------------------------------------------------------|----------------------------------------------------------------------------------------------------------------------------------------------------------------------------------------------------------------------------------------------------------------------------------------------------------|

|             |                         |                                                                                                                                                         |                                                                                                                                                                                  |       |       |    |    |                 |                |                          |                                    |                         |          |                                       |                                                                                                                                                                                       |                                                                                                                                                                                                                                                                                                                                                 |
|-------------|-------------------------|---------------------------------------------------------------------------------------------------------------------------------------------------------|----------------------------------------------------------------------------------------------------------------------------------------------------------------------------------|-------|-------|----|----|-----------------|----------------|--------------------------|------------------------------------|-------------------------|----------|---------------------------------------|---------------------------------------------------------------------------------------------------------------------------------------------------------------------------------------|-------------------------------------------------------------------------------------------------------------------------------------------------------------------------------------------------------------------------------------------------------------------------------------------------------------------------------------------------|
| Sharpe_2012 | Sharpe et al, 2003 [42] | Participants were recruited from consecutive patients at two teaching hospitals and through volunteers from the Arthritis Foundation of NSW newsletter. | patients scheduled for surgery or medication review, a history of psychotic illness, current alcohol or drug abuse, or insufficient English to complete assessment or treatment. | 24(2) | 25(0) | UD | UD | 57.9<br>(12.9)  | 54.2<br>(11.0) | 13.63<br>(14.9)<br>years | Behavior therapy (BT)              | wait-list control (WLC) | 8 weeks  | 1) baseline<br>2) post<br>3) 6 months | Ritchie Articular Index (RAI), C-reactive protein (CRP), Erythrocyte sedimentation rate (ESR), Hospital and Anxiety Depression Scale (HADS), Health Assessment Questionnaire (HAQ-DI) | Participants who received cognitive components had greater improvements in tender joint counts and C-reactive protein at post-treatment. Those receiving either BT or CT alone improved more on anxiety than CBT or WLC. At 6 months, the three active treatment groups could only be distinguished on tender joints, which favored CT and CBT. |
|             |                         |                                                                                                                                                         |                                                                                                                                                                                  | 24(2) | 25(0) |    |    | 55.2<br>(13.3)  | 54.2<br>(11.0) |                          | Cognitive therapy (CT)             |                         |          |                                       |                                                                                                                                                                                       |                                                                                                                                                                                                                                                                                                                                                 |
|             |                         |                                                                                                                                                         |                                                                                                                                                                                  | 25(2) | 25(0) |    |    | 57.7<br>(15.4)  | 54.2<br>(11.0) |                          | Cognitive-behavioral therapy (CBT) |                         |          |                                       |                                                                                                                                                                                       |                                                                                                                                                                                                                                                                                                                                                 |
| Shearn_1985 | Shearn et al, 1985 [43] | Oakland medical center and at neighboring Kaiser Permanente facilities. Contacted by telephone and invited to participate.                              | UD                                                                                                                                                                               | 19(0) | 28(0) | 77 | 77 | 56.4<br>(11.73) | 55<br>(3.29)   | 10.19<br>years           | Stress management training         | no intervention         | 10 weeks | 1) baseline<br>2) post                | Ritchie Articular Index (RAI), Morning stiffness, Visual Analogue Scale (VAS), Disability scale by Fries, Grip                                                                        | Patlents In the Intervention groups showed greater improvement in joint tenderness than did the control                                                                                                                                                                                                                                         |

|       |       |    |    |            |           |                      |  |                                                                                                                              |                     |
|-------|-------|----|----|------------|-----------|----------------------|--|------------------------------------------------------------------------------------------------------------------------------|---------------------|
|       |       |    |    |            |           |                      |  | strength, Walking speed, Erythrocyte sedimentation rate (ESR), Center for Epidemiological Studies - Depression Scale (CES-D) | patients (p < 0.05) |
| 23(0) | 28(0) | 72 | 77 | 57.9 (2.5) | 55 (3.29) | Mutual support group |  |                                                                                                                              |                     |

|              |                          |                                                                                                                         |                                                                                                                                                 |       |       |    |    |             |             |            |                            |                                                                  |          |                                       |                                                                                                                                                                                                                                                                                                                                |                                                                                                                                                                                                                                                                         |
|--------------|--------------------------|-------------------------------------------------------------------------------------------------------------------------|-------------------------------------------------------------------------------------------------------------------------------------------------|-------|-------|----|----|-------------|-------------|------------|----------------------------|------------------------------------------------------------------|----------|---------------------------------------|--------------------------------------------------------------------------------------------------------------------------------------------------------------------------------------------------------------------------------------------------------------------------------------------------------------------------------|-------------------------------------------------------------------------------------------------------------------------------------------------------------------------------------------------------------------------------------------------------------------------|
| Shigaki_2013 | Shigaki et al, 2008 [44] | nationwide convenience sample of adults with RA was recruited using a predominantly passive online recruitment approach | previous exposure to self-management intervention, uncontrolled psychiatric diagnoses, uncontrolled medical comorbidities (e.g., active cancer) | 44(-) | 49(-) | 93 | 92 | 50.3 (11.6) | 49.3 (12.3) | 7.94 years | RAHelp (Patient education) | wait-list, offered their choice of treatment following the study | 10 weeks | 1) baseline<br>2) post<br>3) 9 month. | Arthritis Impact Measurement Scales - 2 (AIMS2), Arthritis Self-Efficacy Scale (ASES), Center for Epidemiological Studies - Depression Scale (CES-D), Rapid Assessment of Disease Activity in Rheumatology (RADAR), Quality of Life Scale (QLS), Social Provisions Scale (SPS), Los Angeles Loneliness Scale, version 3 (LS-3) | Group differences with were found immediately postintervention for self-efficacy (P = 0.00001) and quality of life (P = 0.003), respectively. At 9 months postintervention, differences in self-efficacy (P = 0.00001) and quality of life (P = 0.004) remained robust. |
|--------------|--------------------------|-------------------------------------------------------------------------------------------------------------------------|-------------------------------------------------------------------------------------------------------------------------------------------------|-------|-------|----|----|-------------|-------------|------------|----------------------------|------------------------------------------------------------------|----------|---------------------------------------|--------------------------------------------------------------------------------------------------------------------------------------------------------------------------------------------------------------------------------------------------------------------------------------------------------------------------------|-------------------------------------------------------------------------------------------------------------------------------------------------------------------------------------------------------------------------------------------------------------------------|

|                    |                                |                                                                                                                                                                                                                                     |    |       |       |    |    |             |             |            |                           |                 |         |                                       |                                                       |                                                                                                                                                  |
|--------------------|--------------------------------|-------------------------------------------------------------------------------------------------------------------------------------------------------------------------------------------------------------------------------------|----|-------|-------|----|----|-------------|-------------|------------|---------------------------|-----------------|---------|---------------------------------------|-------------------------------------------------------|--------------------------------------------------------------------------------------------------------------------------------------------------|
| vanMiddendorp_2009 | vanMiddendorp et al, 2009 [48] | Participants were recruited by rheumatologists and rheumatology nurses of the rheumatology divisions of eight hospitals in the Utrecht area, The Netherlands, participating in the Utrecht Rheumatoid Arthritis Cohort study group. | UD | 40(0) | 28(0) | 60 | 71 | 58.7 (11.5) | 59.6 (11.4) | 12.9 years | Oral emotional disclosure | time management | 4 weeks | 1) baseline<br>2) 1 wk<br>3) 3 months | Impact of Rheumatic diseases on General Health (IRGL) | Cortisol (p = 0.01) and the serum level of the pro-inflammatory cytokine IFN-gamma (p = 0.05) were differentially affected by the two conditions |
|--------------------|--------------------------------|-------------------------------------------------------------------------------------------------------------------------------------------------------------------------------------------------------------------------------------|----|-------|-------|----|----|-------------|-------------|------------|---------------------------|-----------------|---------|---------------------------------------|-------------------------------------------------------|--------------------------------------------------------------------------------------------------------------------------------------------------|

|                |                            |                                                                                                                                                             |                                                                                                               |       |       |    |    |             |             |             |                                      |                          |        |                                                  |                                                                                                                                                                                                   |                                                                                                                                                                                                                                                                                                                  |
|----------------|----------------------------|-------------------------------------------------------------------------------------------------------------------------------------------------------------|---------------------------------------------------------------------------------------------------------------|-------|-------|----|----|-------------|-------------|-------------|--------------------------------------|--------------------------|--------|--------------------------------------------------|---------------------------------------------------------------------------------------------------------------------------------------------------------------------------------------------------|------------------------------------------------------------------------------------------------------------------------------------------------------------------------------------------------------------------------------------------------------------------------------------------------------------------|
| Wetherell_2005 | Wetherell et al, 2005 [49] | Potential patients were first identified by a consultant rheumatologist and then approached by a researcher who was blinded to subsequent group allocation. | undergoing any form of psychotherapy, diagnosis of dementia, any other rheumatological or other major illness | 19(0) | 15(0) | 79 | 87 | 62.7 (13.6) | 58.6 (14.7) | 14.94 years | Written or oral emotional disclosure | Write about daily events | 4 days | 1) baseline<br>2) 1 wk<br>3) 6 wks<br>4 ) 10 wks | Disease Activity Score (DAS28), Patient Global Visual Analogue Scale (PG-VAS), Erythrocyte sedimentation rate (ESR), C-reactive protein (CRP), The Short Form of Profile of Mood States (POMS-SF) | The disclosure group demonstrated increases in negative mood and objective markers of disease activity at 1 week postintervention. However, there were significant trends for the disclosure group to demonstrate minor improvements in mood and stability in disease activity, compared with the control group. |
|----------------|----------------------------|-------------------------------------------------------------------------------------------------------------------------------------------------------------|---------------------------------------------------------------------------------------------------------------|-------|-------|----|----|-------------|-------------|-------------|--------------------------------------|--------------------------|--------|--------------------------------------------------|---------------------------------------------------------------------------------------------------------------------------------------------------------------------------------------------------|------------------------------------------------------------------------------------------------------------------------------------------------------------------------------------------------------------------------------------------------------------------------------------------------------------------|



|             |                         |                                                                                                                                                                                                                                                                             |                                                                     |      |       |      |      |                  |                  |                |                                                       |           |         |                                       |                                                                                                                                                                                                                                                            |                                                                                                                                                                                                                                                                                                                                                                                                                                                                                                                                                                                                     |
|-------------|-------------------------|-----------------------------------------------------------------------------------------------------------------------------------------------------------------------------------------------------------------------------------------------------------------------------|---------------------------------------------------------------------|------|-------|------|------|------------------|------------------|----------------|-------------------------------------------------------|-----------|---------|---------------------------------------|------------------------------------------------------------------------------------------------------------------------------------------------------------------------------------------------------------------------------------------------------------|-----------------------------------------------------------------------------------------------------------------------------------------------------------------------------------------------------------------------------------------------------------------------------------------------------------------------------------------------------------------------------------------------------------------------------------------------------------------------------------------------------------------------------------------------------------------------------------------------------|
| Zautra_2008 | Zautra et al, 2008 [54] | Participants were recruited from the Phoenix, AZ region via solicitations at health fairs, to Arthritis Foundation members, and at local physicians' offices as well as from rheumatologist referrals at the Carl T. Hayden Veterans Affairs (VA) Medical Center in Phoenix | taking any cyclical estrogen replacement therapies, Lupus diagnosis | 6(0) | 14(0) | 83,3 | 78,6 | 46.17<br>(12.70) | 51.43<br>(13.89) | 12.67<br>years | Mindfulness meditation and emotion regulation therapy | education | 30 days | 1) baseline<br>2) post<br>3) 6 months | Numerical Rating Scale (NRS), Positive and Negative Affect Scale (PANAS), Checklist based on DSM-IV criteria, Coping efficacy question, Coping Strategies Questionnaire (CSQ), Numerical Rating Scale (NRS), Disease Activity Score (DAS28), Interleukin 6 | Participants receiving CBT showed the greatest Pre to Post improvement in self-reported pain control and reductions in the IL-6; both CBT and Mindfulness groups showed more improvement in coping efficacy than did the Education group. The relative value of the treatments varied as a function of depression history. RA patients with recurrent depression benefited most from Mindfulness across several measures, including negative and positive affect and physicians' ratings of joint tenderness, indicating that the emotion regulation aspects of that treatment were most beneficial |
|-------------|-------------------------|-----------------------------------------------------------------------------------------------------------------------------------------------------------------------------------------------------------------------------------------------------------------------------|---------------------------------------------------------------------|------|-------|------|------|------------------|------------------|----------------|-------------------------------------------------------|-----------|---------|---------------------------------------|------------------------------------------------------------------------------------------------------------------------------------------------------------------------------------------------------------------------------------------------------------|-----------------------------------------------------------------------------------------------------------------------------------------------------------------------------------------------------------------------------------------------------------------------------------------------------------------------------------------------------------------------------------------------------------------------------------------------------------------------------------------------------------------------------------------------------------------------------------------------------|

to those with  
chronic  
depressive  
features.

|           |                       |                                                                                                                                                                                       |                                                                                   |       |       |       |       |                  |                  |         |                                                       |                 |          |                                     |                                |                                                                                                                                  |
|-----------|-----------------------|---------------------------------------------------------------------------------------------------------------------------------------------------------------------------------------|-----------------------------------------------------------------------------------|-------|-------|-------|-------|------------------|------------------|---------|-------------------------------------------------------|-----------------|----------|-------------------------------------|--------------------------------|----------------------------------------------------------------------------------------------------------------------------------|
|           |                       |                                                                                                                                                                                       |                                                                                   | 17(0) | 14(0) | 88,2  | 78,6  | 51 (10.74)       | 51.43<br>(13.89) |         | Cognitive-behavioral therapy (CBT)                    |                 |          |                                     |                                |                                                                                                                                  |
|           |                       |                                                                                                                                                                                       |                                                                                   | 41(0) | 30(0) | 53,7  | 76,7  | 57.29<br>(15.29) | 52.43<br>(12.96) |         | Mindfulness meditation and emotion regulation therapy |                 |          |                                     |                                |                                                                                                                                  |
|           |                       |                                                                                                                                                                                       |                                                                                   | 35(0) | 30(0) | 60    | 76,7  | 56.11<br>(13.49) | 52.43<br>(12.96) |         | Cognitive-behavioral therapy (CBT)                    |                 |          |                                     |                                |                                                                                                                                  |
| Zhao_2019 | Zhao et al, 2019 [55] | The participants were recruited from a university-affiliated and governmental hospital with 4,300 beds in Sichuan Province, China (West China Hospital, Sichuan University, Chengdu). | no phone equipment, hearing or language barriers and severe cognitive impairment. | 43(3) | 39(7) | 26908 | 25355 | 56.93<br>(11.14) | 54.15<br>(10.06) | 4 years | Health education by telephone follow-up (HEFT)        | no intervention | 12 weeks | 1) baseline<br>2) post<br>3) 24 wks | Disease Activity Score (DAS28) | The RASE score of the intervention group was higher than that of the control group (p < .05) at the 12th week and the 24th week. |

|               |                          |                                                                                                                                                                                                                                                  |                                                  |        |       |    |    |             |             |    |                                             |                            |           |                                            |                                                                                                                                                                                                                                                                                                                         |                                                                    |
|---------------|--------------------------|--------------------------------------------------------------------------------------------------------------------------------------------------------------------------------------------------------------------------------------------------|--------------------------------------------------|--------|-------|----|----|-------------|-------------|----|---------------------------------------------|----------------------------|-----------|--------------------------------------------|-------------------------------------------------------------------------------------------------------------------------------------------------------------------------------------------------------------------------------------------------------------------------------------------------------------------------|--------------------------------------------------------------------|
| Zuidema_2019a | Zuidema et al, 2019 [56] | Between December 2014 and June 2015, patients with a diagnosis of RA aged 18 years or older were invited by a letter to participate in this study, in collaboration with rheumatologists, until the required number of 190 patients was reached. | receiving psychiatric or psychological treatment | 57(21) | 75(4) | 65 | 66 | 61.0 (11.3) | 62.9 (10.2) | UD | Web-based self-management enhancing program | routine medical management | 12 months | 1) baseline<br>2) 6 months<br>3) 12 months | Patient Activation Measurement (PAM-13), Self-Management Ability Scale (SMAS-S), Rheumatoid Arthritis Self-Efficacy (RASE), Perceived Efficacy in Patient-Physician Interaction (PEPPI-5), RAND-36 Health Status Inventory (RAND-36), Numerical Rating Scale (NRS), Modified Pain Coping Inventory for Fatigue (MPCI-F) | No positive effects were found regarding the outcome measurements. |
|---------------|--------------------------|--------------------------------------------------------------------------------------------------------------------------------------------------------------------------------------------------------------------------------------------------|--------------------------------------------------|--------|-------|----|----|-------------|-------------|----|---------------------------------------------|----------------------------|-----------|--------------------------------------------|-------------------------------------------------------------------------------------------------------------------------------------------------------------------------------------------------------------------------------------------------------------------------------------------------------------------------|--------------------------------------------------------------------|

|              |                          |                                                                                                                                                                                                          |                                                                           |       |       |       |       |                |                |               |                             |                                                                                      |        |                                                  |                                             |                                                                                                                                                       |
|--------------|--------------------------|----------------------------------------------------------------------------------------------------------------------------------------------------------------------------------------------------------|---------------------------------------------------------------------------|-------|-------|-------|-------|----------------|----------------|---------------|-----------------------------|--------------------------------------------------------------------------------------|--------|--------------------------------------------------|---------------------------------------------|-------------------------------------------------------------------------------------------------------------------------------------------------------|
| Zwikker_2014 | Zwikker et al, 2014 [57] | Patient inclusion took place between September 2009 and February 2011 at the Sint Maartenskliniek (SMK Nijmegen, the Netherlands), a clinic specialized in rheumatology, rehabilitation and orthopedics. | severe mental or physical constraints or illiteracy in the Dutch language | 55(4) | 60(0) | 24289 | 26115 | 60.4<br>(12.1) | 59.3<br>(11.3) | 14.8<br>years | Motivational interview (MI) | received brochures at home about the disease-modifying anti-rheumatic drugs (DMARDS) | 1 week | 1) baseline<br>2) 1 wk<br>3) 6 months<br>4) 1 yr | Beliefs about Medicines Questionnaire (BMQ) | At 12 months' follow-up: participants in the intervention arm had less strong necessity beliefs about medication than participants in the control arm |
|--------------|--------------------------|----------------------------------------------------------------------------------------------------------------------------------------------------------------------------------------------------------|---------------------------------------------------------------------------|-------|-------|-------|-------|----------------|----------------|---------------|-----------------------------|--------------------------------------------------------------------------------------|--------|--------------------------------------------------|---------------------------------------------|-------------------------------------------------------------------------------------------------------------------------------------------------------|

|             |                        |                                                                                                                                                                                                                                                           |    |       |       |     |     |    |    |                     |                                  |                         |        |                                                 |                                                                                                                                                                                                                                                                                                                                                                                                                                                |                                                                                                                                                                                                                                                                                                |
|-------------|------------------------|-----------------------------------------------------------------------------------------------------------------------------------------------------------------------------------------------------------------------------------------------------------|----|-------|-------|-----|-----|----|----|---------------------|----------------------------------|-------------------------|--------|-------------------------------------------------|------------------------------------------------------------------------------------------------------------------------------------------------------------------------------------------------------------------------------------------------------------------------------------------------------------------------------------------------------------------------------------------------------------------------------------------------|------------------------------------------------------------------------------------------------------------------------------------------------------------------------------------------------------------------------------------------------------------------------------------------------|
| Alleva_2018 | Alleva et al, 2018 [1] | Participants were recruited via the website, mailing list, and social media of the National Rheumatoid Arthritis Society, or other relevant media such as private Facebook groups for individuals with rheumatoid arthritis, and other related charities. | UD | 40(9) | 34(1) | 100 | 100 | UD | UD | 11.32 (10.92) years | Expand Your Horizon intervention | wait-list control (WLC) | 4 days | 1) baseline<br>2) post<br>3) 1 wk<br>4) 1 month | Functionalit<br>y<br>Appreciation<br>Scale (FAS),<br>Body<br>Appreciation<br>Scale-2<br>(BAS-2),<br>Multidimens<br>ional Body-<br>Self<br>Relations<br>Questionnair<br>e - Body<br>Areas<br>(BASS),<br>Body<br>Experience<br>Questionnair<br>e (BEQ),<br>Health<br>Assessment<br>Questionnair<br>e (HAQ-DI),<br>Pain<br>Disability<br>Index (PDI),<br>Patient-<br>Reported<br>Outcomes<br>Measuremen<br>t<br>Information<br>System<br>(PROMIS) | Relative to control, participants in the intervention experienced improvements in various aspects of body image (functionality appreciation, body appreciation, body satisfaction, body-self alienation) and decreases in depression, with effects persisting at 1-week and 1-month follow-up. |
|-------------|------------------------|-----------------------------------------------------------------------------------------------------------------------------------------------------------------------------------------------------------------------------------------------------------|----|-------|-------|-----|-----|----|----|---------------------|----------------------------------|-------------------------|--------|-------------------------------------------------|------------------------------------------------------------------------------------------------------------------------------------------------------------------------------------------------------------------------------------------------------------------------------------------------------------------------------------------------------------------------------------------------------------------------------------------------|------------------------------------------------------------------------------------------------------------------------------------------------------------------------------------------------------------------------------------------------------------------------------------------------|

|                |                            |    |    |       |       |       |       |            |            |             |                       |                            |           |                             |                                                                          |                                                                                                                                                                                                                                                                                                                                                                                                                                                                                                      |
|----------------|----------------------------|----|----|-------|-------|-------|-------|------------|------------|-------------|-----------------------|----------------------------|-----------|-----------------------------|--------------------------------------------------------------------------|------------------------------------------------------------------------------------------------------------------------------------------------------------------------------------------------------------------------------------------------------------------------------------------------------------------------------------------------------------------------------------------------------------------------------------------------------------------------------------------------------|
| ElMiedany_2012 | ElMiedany et al, 2012 [14] | UD | UD | 74(0) | 73(0) | 26085 | 26908 | 53.2 (9.6) | 52.8 (9.5) | 11.25 years | Joint-fitness program | routine medical management | 18 months | 1) baseline<br>2) 18 months | Patient Reported Outcome Measures (PROM), Disease Activity Score (DAS28) | The integration of patient education and PROMs led to a significant greater reduction of disease activity parameters, DAS-28 score, as well as improvement of the patients' adherence to therapy (p<0.01). The improvement of disease activity parameters was associated with the improvement in functional disability and quality of life scores. At the 18-month follow-up, both the self-management and cognitive behavioural therapy intervention demonstrated improvement for disease activity. |
|----------------|----------------------------|----|----|-------|-------|-------|-------|------------|------------|-------------|-----------------------|----------------------------|-----------|-----------------------------|--------------------------------------------------------------------------|------------------------------------------------------------------------------------------------------------------------------------------------------------------------------------------------------------------------------------------------------------------------------------------------------------------------------------------------------------------------------------------------------------------------------------------------------------------------------------------------------|

|              |                          |                                                                                                                                                                                                                                                                                                         |                                                                                                                                   |       |       |    |    |             |             |    |                             |                                       |         |                                      |                                                                                                                                                                                                                                                                                                                                                                                         |                                                                                                                                                                                                                                                                                                                                                                                                                                                                  |
|--------------|--------------------------|---------------------------------------------------------------------------------------------------------------------------------------------------------------------------------------------------------------------------------------------------------------------------------------------------------|-----------------------------------------------------------------------------------------------------------------------------------|-------|-------|----|----|-------------|-------------|----|-----------------------------|---------------------------------------|---------|--------------------------------------|-----------------------------------------------------------------------------------------------------------------------------------------------------------------------------------------------------------------------------------------------------------------------------------------------------------------------------------------------------------------------------------------|------------------------------------------------------------------------------------------------------------------------------------------------------------------------------------------------------------------------------------------------------------------------------------------------------------------------------------------------------------------------------------------------------------------------------------------------------------------|
| Knittle_2013 | Knittle et al, 2013 [26] | Patients who had attended the outpatient rheumatology department of either Leiden University Medical Center, Haga Hospital, or Reinier DeGraaf Gasthuis were potentially eligible for study participation. Randomly selected groups of 250 eligible patients were mailed leaflets describing the study. | 5×30 physical activity (PA) recommendation met, physical therapy for RA within the last 6 months received, difficulty ambulating. | 38(0) | 40(0) | 79 | 55 | 60.7 (11.9) | 64.7 (11.5) | UD | Motivational interview (MI) | group-based patient education session | 5 weeks | 1) baseline<br>2) 6 wks<br>3) 32 wks | Short Questionnaire to Assess Health-Enhancing PA (SQuAsH), Days per week with at least 30 min of physical activity, Treatment Self-Regulation Questionnaire (TSRQ-15), Self-Efficacy to Regulate Exercise Scale, Rheumatoid Arthritis Disease Activity Index (RADAI), Health Assessment Questionnaire (HAQ), Brief Symptom Inventory (BSI), Checklist of Individual Strengths (CIS-20) | Significant treatment effects were found for leisure-time PA (p =0.022), active days/week (p =0.016), self-efficacy (p =0.008) and autonomous motivation (p =0.001). At post-treatment and 6- months follow-up, significantly more treated patients than controls met current PA recommendations. Combining motivation- and action-focused intervention approaches improved PA-related cognitions and led to improved uptake and maintenance of leisure-time PA. |
|--------------|--------------------------|---------------------------------------------------------------------------------------------------------------------------------------------------------------------------------------------------------------------------------------------------------------------------------------------------------|-----------------------------------------------------------------------------------------------------------------------------------|-------|-------|----|----|-------------|-------------|----|-----------------------------|---------------------------------------|---------|--------------------------------------|-----------------------------------------------------------------------------------------------------------------------------------------------------------------------------------------------------------------------------------------------------------------------------------------------------------------------------------------------------------------------------------------|------------------------------------------------------------------------------------------------------------------------------------------------------------------------------------------------------------------------------------------------------------------------------------------------------------------------------------------------------------------------------------------------------------------------------------------------------------------|



|             |                         |                                                                                                                                                                                                                                                                                                                                                                                                        |                                                                                                                                                                                                                                                                               |       |       |       |       |                |                |                         |                                                                   |                 |         |                                                          |                                                                                                                                                            |                                                                                                                                                                                                                                                                                                                          |
|-------------|-------------------------|--------------------------------------------------------------------------------------------------------------------------------------------------------------------------------------------------------------------------------------------------------------------------------------------------------------------------------------------------------------------------------------------------------|-------------------------------------------------------------------------------------------------------------------------------------------------------------------------------------------------------------------------------------------------------------------------------|-------|-------|-------|-------|----------------|----------------|-------------------------|-------------------------------------------------------------------|-----------------|---------|----------------------------------------------------------|------------------------------------------------------------------------------------------------------------------------------------------------------------|--------------------------------------------------------------------------------------------------------------------------------------------------------------------------------------------------------------------------------------------------------------------------------------------------------------------------|
| Lumley_2014 | Lumley et al, 2014 [28] | The Michigan site recruited largely through community advertisements, flyers in rheumatologists' offices, and letters sent to patients from the local Arthritis Foundation. The North Carolina site recruited directly through its rheumatology clinics, and the initial contact screening, including confirmation of criteria, was conducted by referring rheumatologists and staff at those clinics. | another autoimmune disorder, current life-threatening disease (e.g., cancer), illiteracy or cognitive impairment, participation in a formal behavioral pain management program, experience of a major stressful life change in the prior 6 months, inability to write or walk | 67(0) | 65(0) | 29373 | 28703 | 56.0<br>(10.4) | 55.3<br>(11.9) | 13.1<br>(11.4)<br>years | Written emotional disclosure (WED) + Coping skills training (CST) | control writing | 8 weeks | 1) baseline<br>2) 1 month<br>3) 4 months<br>4) 12 months | Visual Analogue Scale (VAS), Arthritis Impact Measurement Scales - 2 (AIMS2), McGill Pain Questionnaire (MPQ), Time to walk 50 feet, Inflammatory activity | Compared to control training, CST decreased pain and psychological symptoms through 12 months. The effects of WED were mixed: compared with control writing, WED reduced disease activity and physical disability at 1 month only, but WED had more pain than control writing on one of two measures at 4 and 12 months. |
|-------------|-------------------------|--------------------------------------------------------------------------------------------------------------------------------------------------------------------------------------------------------------------------------------------------------------------------------------------------------------------------------------------------------------------------------------------------------|-------------------------------------------------------------------------------------------------------------------------------------------------------------------------------------------------------------------------------------------------------------------------------|-------|-------|-------|-------|----------------|----------------|-------------------------|-------------------------------------------------------------------|-----------------|---------|----------------------------------------------------------|------------------------------------------------------------------------------------------------------------------------------------------------------------|--------------------------------------------------------------------------------------------------------------------------------------------------------------------------------------------------------------------------------------------------------------------------------------------------------------------------|

|       |       |       |       |                |                |                                             |
|-------|-------|-------|-------|----------------|----------------|---------------------------------------------|
| 69(0) | 65(0) | 29618 | 28703 | 55.2<br>(12.3) | 55.3<br>(11.9) | Written<br>emotional<br>disclosure<br>(WED) |
| 63(0) | 65(0) | 30682 | 28703 | 54.0<br>(13.7) | 55.3<br>(11.9) | Coping skills<br>training<br>(CST)          |

|               |                           |    |    |       |       |    |    |    |    |    |                 |                                              |                            |        |                                                  |                                                                                                                                 |                                                                                                                                                                                                                                                                                                                                                                                                |
|---------------|---------------------------|----|----|-------|-------|----|----|----|----|----|-----------------|----------------------------------------------|----------------------------|--------|--------------------------------------------------|---------------------------------------------------------------------------------------------------------------------------------|------------------------------------------------------------------------------------------------------------------------------------------------------------------------------------------------------------------------------------------------------------------------------------------------------------------------------------------------------------------------------------------------|
| Scholten_1999 | Scholten et al, 1999 [38] | UD | UD | 38(0) | 30(0) | UD | UD | UD | UD | UD | 8.9 (1.2) years | Multidisciplinary Arthritis Training Program | waiting-list control group | 9 days | 1) baseline<br>2) 2 wks<br>3) 6 wks<br>4) 52 wks | Health Assessment Questionnaire (HAQ-DI), Freiburg Questionnaire of Coping with Illness (FQCI), Beck Depression Inventory (BDI) | A significant and persistent improvement of all investigated parameters was demonstrated in the 1-year controlled trial. parameters were demonstrated in the 1-year controlled trial. Between the end-point of the 1-year study and the 5-year evaluation, this improvement increased even more for functional status and coping with illness, whereas depression returned to baseline values. |
|---------------|---------------------------|----|----|-------|-------|----|----|----|----|----|-----------------|----------------------------------------------|----------------------------|--------|--------------------------------------------------|---------------------------------------------------------------------------------------------------------------------------------|------------------------------------------------------------------------------------------------------------------------------------------------------------------------------------------------------------------------------------------------------------------------------------------------------------------------------------------------------------------------------------------------|

|            |                        |                                                        |                                                                                                                                                                                       |       |       |    |    |    |    |    |                      |                 |        |                                                  |                                               |                                                                                                                                                                                                                                                                                                        |
|------------|------------------------|--------------------------------------------------------|---------------------------------------------------------------------------------------------------------------------------------------------------------------------------------------|-------|-------|----|----|----|----|----|----------------------|-----------------|--------|--------------------------------------------------|-----------------------------------------------|--------------------------------------------------------------------------------------------------------------------------------------------------------------------------------------------------------------------------------------------------------------------------------------------------------|
| Smyth_1999 | Smyth et al, 1999 [45] | Volunteers recruited from local communities who had RA | ongoing psychotherapy, psychiatric disorder, symptom report interfering medication usage, more than 10 mg of prednisone daily dosage, inability to write for a duration of 20 minutes | 31(1) | 17(0) | UD | UD | UD | UD | UD | Emotional disclosure | control writing | 3 days | 1) baseline<br>2) 2 wks<br>3) 8 wks<br>4) 16 wks | Physician's global rating of disease activity | Rheumatoid arthritis patients in the experimental group showed improvements in overall disease activity (a mean reduction in disease severity from 1.65 to 1.19 [28%] on a scale 0 [asymptomatic] to 4 [very severe] at the 4 month followup; P = .001, whereas control group patients did not change. |
|------------|------------------------|--------------------------------------------------------|---------------------------------------------------------------------------------------------------------------------------------------------------------------------------------------|-------|-------|----|----|----|----|----|----------------------|-----------------|--------|--------------------------------------------------|-----------------------------------------------|--------------------------------------------------------------------------------------------------------------------------------------------------------------------------------------------------------------------------------------------------------------------------------------------------------|

|            |                        |                                                                                                         |                                   |       |       |       |      |            |            |                   |                                                                          |                            |          |                                        |                                                                                                                                               |                                                                                                                                                                                                                                                     |
|------------|------------------------|---------------------------------------------------------------------------------------------------------|-----------------------------------|-------|-------|-------|------|------------|------------|-------------------|--------------------------------------------------------------------------|----------------------------|----------|----------------------------------------|-----------------------------------------------------------------------------------------------------------------------------------------------|-----------------------------------------------------------------------------------------------------------------------------------------------------------------------------------------------------------------------------------------------------|
| Zangi_2012 | Zangi et al, 2012 [53] | Recruited from three rheumatology departments in south-eastern Norway between March 2007 and June 2009. | Inability to understand Norwegian | 34(2) | 34(1) | 28338 | 80.0 | 53.0 (9.4) | 54.9 (8.9) | 16.2 (12.7) years | Mindfulness based group intervention (Vitality Training Programme - VTP) | routine medical management | 15 weeks | 1) baseline<br>2) post<br>3) 12 months | General Health Questionnaire (GHQ), Arthritis Self-Efficacy Scale (ASES), Emotional Approach Coping Scale (EAC), Numerical Rating Scale (NRS) | Significant treatment effects in favour of the VTP group were found post-treatment and maintained at 12 months in psychological distress, self-efficacy pain and symptoms, emotional processing, fatigue, self-care ability and overall well-being. |
|------------|------------------------|---------------------------------------------------------------------------------------------------------|-----------------------------------|-------|-------|-------|------|------------|------------|-------------------|--------------------------------------------------------------------------|----------------------------|----------|----------------------------------------|-----------------------------------------------------------------------------------------------------------------------------------------------|-----------------------------------------------------------------------------------------------------------------------------------------------------------------------------------------------------------------------------------------------------|

|      |                          |                                                            |                                                                                                                                                                                                                                                                                                                                                                                                                                           |       |        |    |       |             |             |            |                                           |                            |         |                                                                 |                                                                           |                                                                                                                                                                                                      |
|------|--------------------------|------------------------------------------------------------|-------------------------------------------------------------------------------------------------------------------------------------------------------------------------------------------------------------------------------------------------------------------------------------------------------------------------------------------------------------------------------------------------------------------------------------------|-------|--------|----|-------|-------------|-------------|------------|-------------------------------------------|----------------------------|---------|-----------------------------------------------------------------|---------------------------------------------------------------------------|------------------------------------------------------------------------------------------------------------------------------------------------------------------------------------------------------|
| Hadi | Yousefi et al, 2015 [51] | Patients attending the community based Rheumatology clinic | American Rheumatism Association (ARA) class IV (unable to do self care), arthritis other than RA, positive history of mental illness or alcohol or drug abuse, medical condition requiring activity to restrict (e.g. history of more severe heart, lung or cerebrovascular disease), previous participation in a similar intervention program in last 1 year, patient not fit to participate as per the discretion of the rheumatologist | 96(4) | 93(13) | 86 | 32660 | 42.6 (13.2) | 46.6 (10.9) | 14.9 years | Modular program group intervention (MPGI) | routine medical management | 8 weeks | 1) baseline<br>2) 20 wks<br>3) 32 wks<br>4) 48 wks<br>5) 60 wks | Visual Analogue Scale (VAS), Medical Outcomes Study Short Form 36 (SF-36) | Significant worsening in the control group compared to improvement in the intervention group, at 2nd, 3rd, 4th and 5th evaluations, the improvement was often seen as early as 12-24 week follow up. |
|------|--------------------------|------------------------------------------------------------|-------------------------------------------------------------------------------------------------------------------------------------------------------------------------------------------------------------------------------------------------------------------------------------------------------------------------------------------------------------------------------------------------------------------------------------------|-------|--------|----|-------|-------------|-------------|------------|-------------------------------------------|----------------------------|---------|-----------------------------------------------------------------|---------------------------------------------------------------------------|------------------------------------------------------------------------------------------------------------------------------------------------------------------------------------------------------|

|             |                          |                                                                                                                                                    |                                                                                                                                                                                                                                                                                                                                                                                                                     |       |       |       |       |             |             |            |                                 |                  |        |                                                         |                                                                                                                                                                                                                                                           |                                                                                                                                                                                                                                                                                                                                                                                              |
|-------------|--------------------------|----------------------------------------------------------------------------------------------------------------------------------------------------|---------------------------------------------------------------------------------------------------------------------------------------------------------------------------------------------------------------------------------------------------------------------------------------------------------------------------------------------------------------------------------------------------------------------|-------|-------|-------|-------|-------------|-------------|------------|---------------------------------|------------------|--------|---------------------------------------------------------|-----------------------------------------------------------------------------------------------------------------------------------------------------------------------------------------------------------------------------------------------------------|----------------------------------------------------------------------------------------------------------------------------------------------------------------------------------------------------------------------------------------------------------------------------------------------------------------------------------------------------------------------------------------------|
| Lumley_2011 | Lumley et al, 2011 [240] | Recruited adults who met American College of Rheumatology criteria for non-juvenile RA from one of several urban or suburban rheumatology clinics. | Lack of RA related pain and disability, physician-suspected or diagnosed cognitive impairment (dementia or psychosis), illiteracy or non-English speaking, the presence of another autoimmune rheumatic disease or other major medical condition for which treatment is received, being physically unable to write or walk, participation in another clinical trial, or planning to leave the area within 6 months. | 43(0) | 45(0) | 32234 | 80    | 55.4 (11.7) | 54.3 (10.0) | 11.2 years | Emotional disclosure (writing)  | Combined control | 1 week | 1) baseline<br>2) 1 month<br>3) 3 months<br>4) 6 months | McGill Pain Questionnaire - Short Form (MPQ-SF), Arthritis Impact Measurement Scales - 2 (AIMS2), Pain behaviours, Grip strength, Walking speed, Swollen joint count, Physician's global rating of disease activity, Erythrocyte sedimentation rate (ESR) | Written disclosure had minimal effects compared to combined controls—only pain was reduced at 1 and 6 months. Spoken disclosure led to faster walking speed at 3 months, and reduced pain, swollen joints, and physician-rated disease activity at 6 months. Written disclosure improved affective pain and walking speed; spoken disclosure showed only a marginal benefit on sensory pain. |
|             |                          |                                                                                                                                                    |                                                                                                                                                                                                                                                                                                                                                                                                                     | 48(0) | 45(0) | 30376 | 30773 | 53.1 (11.3) | 55.5 (11.9) |            | Emotional disclosure (speaking) | Combined control |        |                                                         |                                                                                                                                                                                                                                                           |                                                                                                                                                                                                                                                                                                                                                                                              |
|             |                          |                                                                                                                                                    |                                                                                                                                                                                                                                                                                                                                                                                                                     | 43(0) | 24(0) | 32234 | 79    | 55.4 (11.7) | 53.1 (10.0) |            | Emotional disclosure (writing)  | Positive control |        |                                                         |                                                                                                                                                                                                                                                           |                                                                                                                                                                                                                                                                                                                                                                                              |

|              |                          |                                                                                                                               |                                                                                                                                                                                        |       |       |       |       |                |                |                        |                                                   |                                  |          |                                  |                                                                                                                                                    |                                                                                                                                                                                                                                                                                                 |
|--------------|--------------------------|-------------------------------------------------------------------------------------------------------------------------------|----------------------------------------------------------------------------------------------------------------------------------------------------------------------------------------|-------|-------|-------|-------|----------------|----------------|------------------------|---------------------------------------------------|----------------------------------|----------|----------------------------------|----------------------------------------------------------------------------------------------------------------------------------------------------|-------------------------------------------------------------------------------------------------------------------------------------------------------------------------------------------------------------------------------------------------------------------------------------------------|
|              |                          |                                                                                                                               |                                                                                                                                                                                        | 48(0) | 24(0) | 30376 | 30376 | 53.1<br>(11.3) | 58.0<br>(12.2) |                        | Emotional<br>disclosure<br>(speaking)             | Positive<br>control              |          |                                  |                                                                                                                                                    |                                                                                                                                                                                                                                                                                                 |
|              |                          |                                                                                                                               |                                                                                                                                                                                        | 43(0) | 21(0) | 32234 | 81    | 55.4<br>(11.7) | 55.7<br>(10.0) |                        | Emotional<br>disclosure<br>(writing)              | Neutral<br>control               |          |                                  |                                                                                                                                                    |                                                                                                                                                                                                                                                                                                 |
|              |                          |                                                                                                                               |                                                                                                                                                                                        | 48(0) | 21(0) | 30376 | 31229 | 53.1<br>(11.3) | 52.6<br>(11.1) |                        | Emotional<br>disclosure<br>(speaking)             | Neutral<br>control               |          |                                  |                                                                                                                                                    |                                                                                                                                                                                                                                                                                                 |
| Masiero_2007 | Masiero et al, 2007 [30] | The patients, recruited via invitation to participate, were hospital outpatients from our hospital's rheumatology department. | (a) Previous participation in educational training (b) Variations in drug therapy at any time during the trial and (c) Rehabilitation treatment or orthopedic surgery during the trial | 36(0) | 34(0) | 29342 | 30042 | 54.2 (9.8)     | 52.2<br>(11.9) | 12.8<br>(8.8)<br>years | Educational-<br>behavioral<br>joint<br>protection | routine<br>medical<br>management | 12 weeks | 1)<br>baseline<br>2) 8<br>months | Arthritis<br>Impact<br>Measurement<br>Scales-2<br>(AIMS2),<br>Health<br>Assessment<br>Questionnaire<br>(HAQ),<br>Visual<br>Analogue<br>Scale (VAS) | After a mean time of 8 months, the patients receiving educational training displayed a significant decrease, compared to the CG, in the VAS (p=0.001), HAQ (p=0.000), and physical (p=0.000), symptoms (p=0.049), and social interaction (p=0.045) scores on the AIMS2, but not in other items. |



|               |                           |                                                                                                                                                                                               |                                                                                                                                                                                                                                                                                                                            |       |       |     |     |               |              |    |                         |                            |         |                                       |                                      |                                                                                                                                                                                                           |
|---------------|---------------------------|-----------------------------------------------------------------------------------------------------------------------------------------------------------------------------------------------|----------------------------------------------------------------------------------------------------------------------------------------------------------------------------------------------------------------------------------------------------------------------------------------------------------------------------|-------|-------|-----|-----|---------------|--------------|----|-------------------------|----------------------------|---------|---------------------------------------|--------------------------------------|-----------------------------------------------------------------------------------------------------------------------------------------------------------------------------------------------------------|
| Moghadam_2018 | Moghadam et al, 2018 [31] | Among 900 patients with rheumatoid arthritis, referring to the rheumatology clinic of Hafez hospital, Shiraz, southwest Iran, 64 women with confirmed RA from May to July 2013 were enrolled. | Changes in the trend of articular therapy and medications during the study or the last 6 months, need to change the treatment, undergoing joint surgery during the study or 6 months before the intervention , participation in a similar training programs and absence in more than two sessions of the training program. | 32(0) | 32(0) | 100 | 100 | 48.06 (10.51) | 48.87 (9.24) | UD | Group education program | routine medical management | 8 weeks | 1) baseline<br>2) post<br>3) 3 months | Arthritis Self-Efficacy Scale (ASES) | Mean of self-efficacy scores of the intervention group, immediately and three months after the intervention, significantly enhanced in all dimensions compared with the control group (P<0.001, P<0.001). |
|---------------|---------------------------|-----------------------------------------------------------------------------------------------------------------------------------------------------------------------------------------------|----------------------------------------------------------------------------------------------------------------------------------------------------------------------------------------------------------------------------------------------------------------------------------------------------------------------------|-------|-------|-----|-----|---------------|--------------|----|-------------------------|----------------------------|---------|---------------------------------------|--------------------------------------|-----------------------------------------------------------------------------------------------------------------------------------------------------------------------------------------------------------|

|          |                      |                                                                          |                                                                                                                                                                                                                       |       |       |    |    |    |    |    |                                                      |                            |        |                        |                                        |                                                                                                                                                                                |
|----------|----------------------|--------------------------------------------------------------------------|-----------------------------------------------------------------------------------------------------------------------------------------------------------------------------------------------------------------------|-------|-------|----|----|----|----|----|------------------------------------------------------|----------------------------|--------|------------------------|----------------------------------------|--------------------------------------------------------------------------------------------------------------------------------------------------------------------------------|
| Nia_2018 | Nia et al, 2018 [33] | Patients with RA referring to a rheumatology clinic in Yasuj City, 2016. | High score of pain (mild pain) based on scale, patient's unwillingness to participate, hearing and vision problems, patient's immigration or death, and having an unpleasant memory of forests and natural sceneries. | 25(0) | 25(0) | UD | UD | UD | UD | UD | Eye movement desensitization and reprocessing (EMDR) | waiting-list control group | 6 days | 1) baseline<br>2) post | Rheumatoid Arthritis Pain Scale (RAPS) | A significant difference was observed in the mean pain score between EMDR and guided imagery groups, and also between each intervention group and the control group (P=0.001). |
|          |                      |                                                                          |                                                                                                                                                                                                                       | 25(0) | 25(0) | UD | UD | UD | UD |    | Guided imagery                                       |                            |        |                        |                                        |                                                                                                                                                                                |

|            |                        |                                                                                                                                                                                                                                                                                                                                                            |                                                                                                                                                                                              |       |       |    |    |               |               |             |                        |                            |        |                             |                                                                                                                                                                    |                                                                                                                                                                                                                                                                                                                                                                                                                    |
|------------|------------------------|------------------------------------------------------------------------------------------------------------------------------------------------------------------------------------------------------------------------------------------------------------------------------------------------------------------------------------------------------------|----------------------------------------------------------------------------------------------------------------------------------------------------------------------------------------------|-------|-------|----|----|---------------|---------------|-------------|------------------------|----------------------------|--------|-----------------------------|--------------------------------------------------------------------------------------------------------------------------------------------------------------------|--------------------------------------------------------------------------------------------------------------------------------------------------------------------------------------------------------------------------------------------------------------------------------------------------------------------------------------------------------------------------------------------------------------------|
| Nunez_2006 | Nunez et al, 2006 [34] | Patients who agreed to participate in the program and gave informed consent were referred from the outpatient clinic of the Rheumatology department of the Hospital Clinic, a tertiary care center in Barcelona, Spain, to the therapeutic education and functional readaptation (TEFR) Unit of the musculoskeletal clinic institute of the same hospital. | illiteracy; disease onset <16 years of age; other inflammatory joint disease in addition to RA; pain due to infection, metabolic or neoplastic disease; diagnosis of severe psychopathology. | 22(0) | 21(0) | 29 | 36 | 51.09 (16.62) | 55.40 (16.32) | 20.5 months | Education intervention | routine medical management | 1 year | 1) baseline<br>2) 18 months | Health Assessment Questionnaire (HAQ-DI), Visual Analogue Scale (VAS), Erythrocyte sedimentation rate (ESR), C-reactive protein (CRP), Visual Analogue Scale (VAS) | At 18 months, patients in the intervention group had less disability (HAQ), pain intensity, number of tender and swollen joints, and patient's and physician's global assessments (p=0.003, 0.031, 0.003, 0.001, 0.014, and 0.004, respectively) compared with baseline, and improvements in disability and number of tender and swollen joints (p=0.024, 0.040, and 0.003, respectively), compared with controls. |
|------------|------------------------|------------------------------------------------------------------------------------------------------------------------------------------------------------------------------------------------------------------------------------------------------------------------------------------------------------------------------------------------------------|----------------------------------------------------------------------------------------------------------------------------------------------------------------------------------------------|-------|-------|----|----|---------------|---------------|-------------|------------------------|----------------------------|--------|-----------------------------|--------------------------------------------------------------------------------------------------------------------------------------------------------------------|--------------------------------------------------------------------------------------------------------------------------------------------------------------------------------------------------------------------------------------------------------------------------------------------------------------------------------------------------------------------------------------------------------------------|

|           |                       |                                                                                                                                  |                                                                                                                                          |       |       |       |       |                  |                  |    |                                     |                            |          |                                       |                                                                      |                                                                                                                             |
|-----------|-----------------------|----------------------------------------------------------------------------------------------------------------------------------|------------------------------------------------------------------------------------------------------------------------------------------|-------|-------|-------|-------|------------------|------------------|----|-------------------------------------|----------------------------|----------|---------------------------------------|----------------------------------------------------------------------|-----------------------------------------------------------------------------------------------------------------------------|
| Song_2020 | Song et al, 2020 [46] | Potential patients were recruited from a department of rheumatology, at a tertiary hospital in Chengdu, Sichuan province, China. | (a) hearing impairment; (b) lack of telephone; (c) severe cognitive or mental disorder; (d) participation in other educational programs. | 41(0) | 36(0) | 26696 | 25294 | 57.05<br>(11.31) | 53.22<br>(10.04) | UD | Telehealth educational intervention | routine medical management | 12 weeks | 1) baseline<br>2) 12 wks<br>3) 24 wks | Disease Activity Score (DAS28), Erythrocyte sedimentation rate (ESR) | The intervention group had significantly higher medication adherence compared with the control group at 12th and 24th week. |
|-----------|-----------------------|----------------------------------------------------------------------------------------------------------------------------------|------------------------------------------------------------------------------------------------------------------------------------------|-------|-------|-------|-------|------------------|------------------|----|-------------------------------------|----------------------------|----------|---------------------------------------|----------------------------------------------------------------------|-----------------------------------------------------------------------------------------------------------------------------|

|                 |                             |                                                                                                                                                                                                                              |                                                                                                                                                                                                                       |       |       |    |       |               |               |            |                                    |                            |            |                          |                                                                                                                                                                                                                                    |                                                                                                                                                                                                                                                                                                                       |
|-----------------|-----------------------------|------------------------------------------------------------------------------------------------------------------------------------------------------------------------------------------------------------------------------|-----------------------------------------------------------------------------------------------------------------------------------------------------------------------------------------------------------------------|-------|-------|----|-------|---------------|---------------|------------|------------------------------------|----------------------------|------------|--------------------------|------------------------------------------------------------------------------------------------------------------------------------------------------------------------------------------------------------------------------------|-----------------------------------------------------------------------------------------------------------------------------------------------------------------------------------------------------------------------------------------------------------------------------------------------------------------------|
| Taibanguay_2019 | Taibanguay et al, 2019 [47] | Patients who fulfilled the 2010 American College of Rheumatology/European League against Rheumatism criteria for RA were recruited from rheumatology clinic of the Phramongkutklo Hospital from March 2017 to February 2018. | <18 years of age, diagnosed with life-threatening conditions, unable to read Thai, unable to take medication by him/herself, high disease activity (disease activity score-28, [DAS28] .5.1), severe mental disorder. | 60(0) | 59(0) | 85 | 30317 | 55.82 (11.25) | 57.20 (12.24) | 8.01 years | Multi-component intervention group | routine medical management | 30 minutes | 1) baseline<br>2) 12 wks | Medication-taking Behavior Questionnaire (MTB), Disease Activity Score (DAS28), EuroQol 5 Dimensions (EQ-5D-5L), EuroQol Visual Analog Scale (EQ-VAS), Visual Analogue Scale (VAS), Brief Illness Perception Questionnaire (B-IPQ) | After 12 weeks, the pill count adherence rate increased significantly from baseline in both study groups. In the multi-component intervention group, adherence rate increased from 92.21±14.05 to 97.59±10.07 (P=0.002) and in the single intervention group, it increased from 88.60±19.66 to 92.42±14.27 (P=0.044). |
|-----------------|-----------------------------|------------------------------------------------------------------------------------------------------------------------------------------------------------------------------------------------------------------------------|-----------------------------------------------------------------------------------------------------------------------------------------------------------------------------------------------------------------------|-------|-------|----|-------|---------------|---------------|------------|------------------------------------|----------------------------|------------|--------------------------|------------------------------------------------------------------------------------------------------------------------------------------------------------------------------------------------------------------------------------|-----------------------------------------------------------------------------------------------------------------------------------------------------------------------------------------------------------------------------------------------------------------------------------------------------------------------|

|              |                          |                                                                                                                |                                                                                                                                                                    |       |       |       |       |                 |                 |    |                                           |                            |         |                        |                                              |                                                                                                                                                                                                                                                                                                                                                                                                                                                                                                                                 |
|--------------|--------------------------|----------------------------------------------------------------------------------------------------------------|--------------------------------------------------------------------------------------------------------------------------------------------------------------------|-------|-------|-------|-------|-----------------|-----------------|----|-------------------------------------------|----------------------------|---------|------------------------|----------------------------------------------|---------------------------------------------------------------------------------------------------------------------------------------------------------------------------------------------------------------------------------------------------------------------------------------------------------------------------------------------------------------------------------------------------------------------------------------------------------------------------------------------------------------------------------|
| Yazdani_2017 | Yazdani et al, 2017 [50] | The research population included the clients with RA who had referred to Arya Hospital for treatment purposes. | Reluctance to continue participating in the intervention , absence for more than two sessions and inability to perform PMR due to increased pain or other reasons. | 31(0) | 31(0) | 29373 | 30560 | 50.3<br>(9.65)  | 48<br>(9.19)    | UD | Progressive muscle relaxation             | no intervention            | 8 weeks | 1) baseline<br>2) post | Medical Outcomes Study Short Form 36 (SF-36) | The findings of the study showed that, in the experimental group, the mean score of life quality changed from 37.84 to 54.54 after the intervention (p=0.00001), while, in the control group, it altered from 37.47 to 43.20. There was a significant difference between experimental and control groups regarding the six aspects of life quality including physical function (p=0.041), vitality (p=0.029), social function (p=0.017), mental health (p=0.001), general health (p=0.002), and psychological health (p=0.002). |
| Yousefi_2022 | Yousefi et al, 2022 [52] | Participants included all patients with rheumatoid                                                             | Any joint disease other than rheumatoid                                                                                                                            | 19(0) | 19(0) | 30713 | 30713 | 51.26<br>(5.70) | 50.89<br>(6.84) | UD | Mindfulness Based Stress Reduction (MBSR) | routine medical management | 8 weeks | 1) baseline<br>2) post | Chalder Fatigue Scale (CFS), Pittsburgh      | At post-treatment, both MBSR and CBT groups                                                                                                                                                                                                                                                                                                                                                                                                                                                                                     |

arthritis referred to the rheumatology office in Kashan. arthritis, drug use if, during the research, the participant for any reason needs a drug other than the prescribed drugs will not be considered despite attending meetings in the study, alcohol consumption, absence from more than one session in MBSR sessions, absence from CBT sessions for more than two sessions.

3) 3 months Sleep Quality Questionnaire (PSQQ), Tower of London test (TOL), Disease Activity Score (DAS28) were significantly more effective than the control group on all variables ( $P < .001$ ) except disease activity ( $P > .05$ ). In the post-test and Follow-up stages, the mean of chronic fatigue and sleep quality in the intervention groups (MBSR and CBT) was significantly lower than in the control group; also, concerning the executive performance variable, in the post-test stage, the average executive performance in the CBT group was significantly higher than the control group and in the Follow-up stage, the average of both intervention groups was significantly higher than the control group.

|       |       |       |       |                 |                 |                                               |          |
|-------|-------|-------|-------|-----------------|-----------------|-----------------------------------------------|----------|
| 19(0) | 19(0) | 30713 | 30713 | 48.73<br>(7.30) | 50.89<br>(6.84) | Cognitive-<br>behavioural<br>therapy<br>(CBT) | 10 weeks |
|-------|-------|-------|-------|-----------------|-----------------|-----------------------------------------------|----------|
